# Supplementary material for: Dynamics of Pyricularia oryzae Population Race Structures from 2003 to 2017 in Jiangsu Province, China
Source: MDPI journal article supplement (doi:10.3390/agronomy12040956), 2022-04-15
Supplement: s1 [file s1]

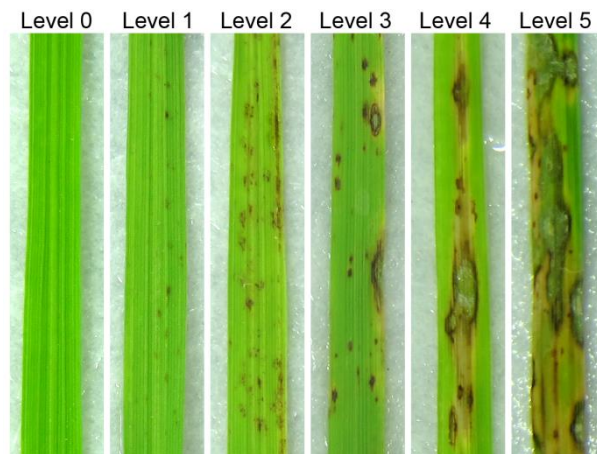

**Figure S1.** The schematic diagram of leaf blast classification. Level 0 to 2: resistant; Level 3 to 5: susceptible.

**Table S1.** Race designation of isolates of *P. oryzae* collected in Jiangsu province from 2003 to 2017 was tested with CDC entries.

| Isolate ID | Sample location | Chinese differential cultivars (CDCs) |             |           |              |          |            | LT<br>H | CDC race |
|------------|-----------------|---------------------------------------|-------------|-----------|--------------|----------|------------|---------|----------|
|            |                 | Tetep                                 | Zhenlong 13 | Sifeng 43 | Dongnong 363 | Kando 51 | Hejiang 18 |         |          |
| 2003-1     | Xuzhou          | R                                     | S           | S         | R            | R        | S          | S       | ZB13     |
| 2003-2     |                 | R                                     | S           | S         | R            | R        | S          | S       | ZB13     |
| 2003-3     |                 | R                                     | S           | S         | R            | R        | S          | S       | ZB13     |
| 2003-4     |                 | R                                     | S           | S         | R            | R        | S          | S       | ZB13     |
| 2003-5     |                 | R                                     | S           | S         | R            | R        | S          | S       | ZB13     |
| 2003-6     |                 | R                                     | S           | S         | R            | R        | R          | S       | ZB15     |
| 2003-7     |                 | R                                     | S           | S         | S            | R        | S          | S       | ZB5      |
| 2003-8     |                 | R                                     | S           | R         | R            | R        | R          | S       | ZB31     |
| 2003-9     |                 | R                                     | R           | S         | S            | S        | S          | S       | ZC1      |
| 2003-10    |                 | R                                     | R           | S         | R            | R        | S          | S       | ZC13     |
| 2003-11    |                 | R                                     | R           | S         | R            | R        | S          | S       | ZC13     |
| 2003-12    |                 | R                                     | R           | R         | R            | R        | R          | S       | ZG1      |
| 2003-13    |                 | R                                     | R           | R         | R            | R        | R          | S       | ZG1      |
| 2003-14    |                 | R                                     | R           | R         | R            | R        | R          | S       | ZG1      |
| 2003-15    |                 | R                                     | R           | R         | R            | R        | R          | S       | ZG1      |
| 2003-16    |                 | R                                     | R           | R         | R            | R        | R          | S       | ZG1      |
| 2003-17    |                 | R                                     | R           | R         | R            | R        | R          | S       | ZG1      |
| 2003-18    | Nanjing         | S                                     | S           | S         | R            | R        | S          | S       | ZA13     |
| 2003-19    |                 | R                                     | S           | S         | R            | R        | S          | S       | ZB13     |
| 2003-20    |                 | R                                     | S           | S         | R            | R        | R          | S       | ZB15     |
| 2003-21    |                 | R                                     | S           | S         | R            | R        | R          | S       | ZB15     |
| 2003-22    |                 | R                                     | S           | R         | S            | R        | S          | S       | ZB21     |
| 2003-23    |                 | R                                     | S           | R         | R            | S        | S          | S       | ZB25     |
| 2003-24    |                 | R                                     | R           | S         | R            | R        | S          | S       | ZC13     |

|         |         |   |   |   |   |   |   |   |      |
|---------|---------|---|---|---|---|---|---|---|------|
| 2003-25 |         | R | R | S | R | R | S | S | ZC13 |
| 2003-26 |         | R | R | R | R | S | R | S | ZE3  |
| 2003-27 |         | R | R | R | R | R | R | S | ZG1  |
| 2003-28 |         | R | R | R | R | R | R | S | ZG1  |
| 2003-29 |         | R | R | R | R | R | R | S | ZG1  |
| 2003-30 |         | R | R | R | R | R | R | S | ZG1  |
| 2003-31 |         | R | R | R | R | R | R | S | ZG1  |
| 2003-32 |         | R | R | R | R | R | R | S | ZG1  |
| 2003-33 |         | R | R | R | R | R | R | S | ZG1  |
| 2003-34 |         | R | R | R | R | R | R | S | ZG1  |
| 2003-35 |         | R | R | R | R | R | R | S | ZG1  |
| 2003-36 |         | R | R | R | R | R | R | S | ZG1  |
| 2003-37 |         | R | R | R | R | R | R | S | ZG1  |
| 2003-38 |         | R | R | R | R | R | R | S | ZG1  |
| 2003-39 |         | R | R | R | R | R | R | S | ZG1  |
| 2003-40 |         | R | R | R | R | R | R | S | ZG1  |
| 2003-41 |         | R | R | R | R | R | R | S | ZG1  |
| 2003-42 |         | R | R | R | R | R | R | S | ZG1  |
| 2003-43 | Taizhou | R | R | R | R | R | R | S | ZG1  |
| 2003-44 |         | R | R | R | R | R | R | S | ZG1  |
| 2003-45 |         | R | R | R | R | R | R | S | ZG1  |
| 2003-46 |         | R | R | R | R | R | R | S | ZG1  |
| 2003-47 |         | R | R | R | R | R | R | S | ZG1  |
| 2003-48 |         | R | R | R | R | R | R | S | ZG1  |
| 2003-49 |         | R | R | R | R | R | R | S | ZG1  |
| 2003-50 | Suzhou  | R | S | R | R | R | R | S | ZB31 |
| 2003-51 |         | R | S | R | R | R | R | S | ZB31 |
| 2003-52 |         | R | S | R | R | R | R | S | ZB31 |
| 2003-53 |         | R | S | S | S | R | S | S | ZB5  |
| 2003-54 |         | R | S | S | S | R | S | S | ZB5  |
| 2003-55 |         | R | S | S | S | R | S | S | ZB5  |
| 2003-56 |         | R | R | S | R | R | R | S | ZC15 |
| 2003-57 |         | R | R | R | S | R | S | S | ZD5  |
| 2003-58 |         | R | R | R | R | S | R | S | ZE3  |
| 2003-59 |         | R | R | R | R | R | S | S | ZF1  |
| 2003-60 |         | R | R | R | R | R | R | S | ZG1  |
| 2003-61 |         | R | R | R | R | R | R | S | ZG1  |
| 2003-62 |         | R | R | R | R | R | R | S | ZG1  |
| 2003-63 |         | R | R | R | R | R | R | S | ZG1  |
| 2003-64 |         | R | R | R | R | R | R | S | ZG1  |
| 2003-65 |         | R | R | R | R | R | R | S | ZG1  |
| 2003-66 |         | R | R | R | R | R | R | S | ZG1  |
| 2003-67 |         | R | R | R | R | R | R | S | ZG1  |
| 2003-68 |         | R | R | R | R | R | R | S | ZG1  |
| 2003-69 |         | R | R | R | R | R | R | S | ZG1  |
| 2003-70 |         | R | R | R | R | R | R | S | ZG1  |
| 2003-71 |         | R | R | R | R | R | R | S | ZG1  |
| 2003-72 |         | R | R | R | R | R | R | S | ZG1  |

|          |         |   |   |   |   |   |   |   |      |
|----------|---------|---|---|---|---|---|---|---|------|
| 2003-73  |         | R | R | R | R | R | R | S | ZG1  |
| 2003-74  |         | R | R | R | R | R | R | S | ZG1  |
| 2003-75  |         | R | R | R | R | R | R | S | ZG1  |
| 2003-76  |         | R | R | R | R | R | R | S | ZG1  |
| 2003-77  |         | R | R | R | R | R | R | S | ZG1  |
| 2003-78  |         | R | R | R | R | R | R | S | ZG1  |
| 2003-79  |         | R | R | R | R | R | R | S | ZG1  |
| 2003-80  |         | R | R | R | R | R | R | S | ZG1  |
| 2003-81  |         | R | R | R | R | R | R | S | ZG1  |
| 2003-82  |         | R | R | R | R | R | R | S | ZG1  |
| 2003-83  |         | R | R | R | R | R | R | S | ZG1  |
| 2003-84  |         | R | R | R | R | R | R | S | ZG1  |
| 2003-85  |         | R | R | R | R | R | R | S | ZG1  |
| 2003-86  |         | R | S | R | S | R | S | S | ZB21 |
| 2003-87  |         | R | S | R | S | R | S | S | ZB21 |
| 2003-88  |         | R | S | R | R | R | R | S | ZB31 |
| 2003-89  |         | R | S | S | S | R | S | S | ZB5  |
| 2003-90  |         | R | R | S | S | R | S | S | ZC5  |
| 2003-91  |         | R | R | S | S | R | S | S | ZC5  |
| 2003-92  |         | R | R | S | R | R | R | S | ZC15 |
| 2003-93  |         | R | R | R | S | R | S | S | ZD5  |
| 2003-94  |         | R | R | R | S | R | S | S | ZD5  |
| 2003-95  |         | R | R | R | S | R | S | S | ZD5  |
| 2003-96  | Nantong | R | R | R | R | S | R | S | ZE3  |
| 2003-97  |         | R | R | R | R | R | S | S | ZF1  |
| 2003-98  |         | R | R | R | R | R | R | S | ZG1  |
| 2003-99  |         | R | R | R | R | R | R | S | ZG1  |
| 2003-100 |         | R | R | R | R | R | R | S | ZG1  |
| 2003-101 |         | R | R | R | R | R | R | S | ZG1  |
| 2003-102 |         | R | R | R | R | R | R | S | ZG1  |
| 2003-103 |         | R | R | R | R | R | R | S | ZG1  |
| 2003-104 |         | R | R | R | R | R | R | S | ZG1  |
| 2003-105 |         | R | R | R | R | R | R | S | ZG1  |
| 2003-106 |         | R | R | R | R | R | R | S | ZG1  |
| 2004-1   |         | R | S | S | S | S | S | S | ZB1  |
| 2004-2   |         | R | S | S | S | R | S | S | ZB5  |
| 2004-3   |         | R | S | S | R | R | S | S | ZB13 |
| 2004-4   |         | R | S | S | R | R | S | S | ZB13 |
| 2004-5   |         | R | S | S | R | R | S | S | ZB13 |
| 2004-6   |         | R | S | S | R | R | S | S | ZB13 |
| 2004-7   |         | R | S | S | R | R | S | S | ZB13 |
| 2004-8   | Xuzhou  | R | S | S | R | R | S | S | ZB13 |
| 2004-9   |         | R | S | R | S | R | S | S | ZB21 |
| 2004-10  |         | R | S | R | R | S | R | S | ZB27 |
| 2004-11  |         | R | S | S | R | R | R | S | ZB15 |
| 2004-12  |         | R | S | S | R | R | R | S | ZB15 |
| 2004-13  |         | R | S | R | R | R | R | S | ZB31 |
| 2004-14  |         | R | R | S | S | S | S | S | ZC1  |

|         |         |   |   |   |   |   |   |   |      |
|---------|---------|---|---|---|---|---|---|---|------|
| 2004-15 |         | R | R | S | R | R | S | S | ZC13 |
| 2004-16 |         | R | R | R | R | R | S | S | ZF1  |
| 2004-17 |         | R | R | R | R | R | R | S | ZG1  |
| 2004-18 |         | R | R | R | R | R | R | S | ZG1  |
| 2004-19 |         | R | R | R | R | R | R | S | ZG1  |
| 2004-20 |         | R | R | R | R | R | R | S | ZG1  |
| 2004-21 |         | R | R | R | R | R | R | S | ZG1  |
| 2004-22 |         | R | R | R | R | R | R | S | ZG1  |
| 2004-23 |         | R | R | R | R | R | R | S | ZG1  |
| 2004-24 |         | R | R | R | R | R | R | S | ZG1  |
| 2004-25 |         | R | R | R | R | R | R | S | ZG1  |
| 2004-26 |         | R | R | R | R | R | R | S | ZG1  |
| 2004-27 |         | R | R | R | R | R | R | S | ZG1  |
| 2004-28 |         | R | R | R | S | R | S | S | ZD5  |
| 2004-29 |         | R | R | R | R | S | S | S | ZE1  |
| 2004-30 |         | R | R | R | R | S | R | S | ZE3  |
| 2004-31 |         | R | R | R | R | S | R | S | ZE3  |
| 2004-32 |         | R | R | R | R | S | R | S | ZE3  |
| 2004-33 |         | R | R | R | R | R | R | S | ZG1  |
| 2004-34 |         | R | R | R | R | R | R | S | ZG1  |
| 2004-35 |         | R | R | R | R | R | R | S | ZG1  |
| 2004-36 |         | R | R | R | R | R | R | S | ZG1  |
| 2004-37 |         | R | R | R | R | R | R | S | ZG1  |
| 2004-38 | Taizhou | R | R | R | R | R | R | S | ZG1  |
| 2004-39 |         | R | R | R | R | R | R | S | ZG1  |
| 2004-40 |         | R | R | R | R | R | R | S | ZG1  |
| 2004-41 |         | R | R | R | R | R | R | S | ZG1  |
| 2004-42 |         | R | R | R | R | R | R | S | ZG1  |
| 2004-43 |         | R | R | R | R | R | R | S | ZG1  |
| 2004-44 |         | R | R | R | R | R | R | S | ZG1  |
| 2004-45 |         | R | R | R | R | R | R | S | ZG1  |
| 2004-46 |         | R | R | R | R | R | R | S | ZG1  |
| 2004-47 |         | R | R | R | R | R | R | S | ZG1  |
| 2004-48 |         | R | R | R | R | R | R | S | ZG1  |
| 2004-49 |         | R | R | R | R | S | S | S | ZE1  |
| 2004-50 |         | R | R | R | R | R | S | S | ZF1  |
| 2004-51 |         | R | R | R | R | R | R | S | ZG1  |
| 2004-52 | Nanjing | R | R | R | R | R | R | S | ZG1  |
| 2004-53 |         | R | R | R | R | R | R | S | ZG1  |
| 2004-54 |         | R | R | R | R | R | R | S | ZG1  |
| 2004-55 |         | R | R | R | R | R | R | S | ZG1  |
| 2004-56 |         | R | S | R | R | R | S | S | ZB29 |
| 2004-57 |         | R | S | R | R | R | S | S | ZB29 |
| 2004-58 |         | R | S | R | R | R | S | S | ZB29 |
| 2004-59 | Nantong | R | R | S | S | R | S | S | ZC5  |
| 2004-60 |         | R | R | S | R | R | R | S | ZC15 |
| 2004-61 |         | R | R | R | R | S | R | S | ZE3  |
| 2004-62 |         | R | R | R | R | R | S | S | ZF1  |

|          |         |   |   |   |   |   |   |   |      |
|----------|---------|---|---|---|---|---|---|---|------|
| 2004-63  |         | R | R | R | R | R | S | S | ZF1  |
| 2004-64  |         | R | R | R | R | R | R | S | ZG1  |
| 2004-65  |         | R | R | R | R | R | R | S | ZG1  |
| 2004-66  |         | R | R | R | R | R | R | S | ZG1  |
| 2004-67  |         | R | R | R | R | R | R | S | ZG1  |
| 2004-68  |         | R | R | R | R | R | R | S | ZG1  |
| 2004-69  |         | R | R | R | R | R | R | S | ZG1  |
| 2004-70  |         | R | R | R | R | R | R | S | ZG1  |
| 2004-71  |         | R | R | R | R | R | R | S | ZG1  |
| 2004-72  |         | R | R | R | R | R | R | S | ZG1  |
| 2004-73  |         | R | R | R | R | R | R | S | ZG1  |
| 2004-74  |         | R | S | S | R | R | S | S | ZB13 |
| 2004-75  |         | R | S | S | R | R | R | S | ZB15 |
| 2004-76  |         | R | S | R | R | R | R | S | ZB31 |
| 2004-77  |         | R | S | R | R | R | R | S | ZB31 |
| 2004-78  |         | R | R | R | R | S | S | S | ZE1  |
| 2004-79  |         | R | R | R | R | S | R | S | ZE3  |
| 2004-80  |         | R | R | R | R | S | R | S | ZE3  |
| 2004-81  |         | R | R | R | R | S | R | S | ZE3  |
| 2004-82  |         | R | R | R | R | S | R | S | ZE3  |
| 2004-83  |         | R | R | R | R | S | R | S | ZE3  |
| 2004-84  |         | R | R | R | R | R | R | S | ZG1  |
| 2004-85  |         | R | R | R | R | R | R | S | ZG1  |
| 2004-86  |         | R | R | R | R | R | R | S | ZG1  |
| 2004-87  |         | R | R | R | R | R | R | S | ZG1  |
| 2004-88  | Suzhou  | R | R | R | R | R | R | S | ZG1  |
| 2004-89  |         | R | R | R | R | R | R | S | ZG1  |
| 2004-90  |         | R | R | R | R | R | R | S | ZG1  |
| 2004-91  |         | R | R | R | R | R | R | S | ZG1  |
| 2004-92  |         | R | R | R | R | R | R | S | ZG1  |
| 2004-93  |         | R | R | R | R | R | R | S | ZG1  |
| 2004-94  |         | R | R | R | R | R | R | S | ZG1  |
| 2004-95  |         | R | R | R | R | R | R | S | ZG1  |
| 2004-96  |         | R | R | R | R | R | R | S | ZG1  |
| 2004-97  |         | R | R | R | R | R | R | S | ZG1  |
| 2004-98  |         | R | R | R | R | R | R | S | ZG1  |
| 2004-99  |         | R | R | R | R | R | R | S | ZG1  |
| 2004-100 |         | R | R | R | R | R | R | S | ZG1  |
| 2004-101 |         | R | R | R | R | R | R | S | ZG1  |
| 2005-1   |         | R | R | R | R | R | R | S | ZG1  |
| 2005-2   |         | R | R | R | R | R | R | S | ZG1  |
| 2005-3   |         | R | R | R | R | R | R | S | ZG1  |
| 2005-4   |         | R | R | R | R | R | R | S | ZG1  |
| 2005-5   | Nanjing | R | S | R | R | R | R | S | ZB31 |
| 2005-6   |         | R | S | R | R | S | R | S | ZB27 |
| 2005-7   |         | R | R | R | R | R | R | S | ZG1  |
| 2005-8   |         | R | S | S | R | R | R | S | ZB15 |
| 2005-9   |         | R | R | R | R | R | R | S | ZG1  |

|         |         |   |   |   |   |   |   |   |      |
|---------|---------|---|---|---|---|---|---|---|------|
| 2005-10 |         | R | R | R | R | R | R | S | ZG1  |
| 2005-11 |         | R | R | R | R | R | R | S | ZG1  |
| 2005-12 |         | R | S | R | R | R | R | S | ZB31 |
| 2005-13 |         | R | R | R | R | R | S | S | ZG1  |
| 2005-14 |         | R | S | R | R | S | S | S | ZB25 |
| 2005-15 | Taizhou | R | R | S | R | R | R | S | ZC15 |
| 2005-16 |         | R | R | R | R | R | R | S | ZG1  |
| 2005-17 |         | R | R | R | R | R | R | S | ZG1  |
| 2005-18 |         | R | R | R | R | R | R | S | ZG1  |
| 2005-19 |         | R | R | R | R | R | R | S | ZG1  |
| 2005-20 |         | R | R | R | R | R | R | S | ZG1  |
| 2005-21 |         | R | R | R | R | R | R | S | ZG1  |
| 2005-22 |         | R | R | R | R | R | R | S | ZG1  |
| 2005-23 |         | R | R | R | R | R | R | S | ZG1  |
| 2005-24 |         | R | R | R | R | R | R | S | ZG1  |
| 2005-25 |         | R | R | R | R | R | R | S | ZG1  |
| 2005-26 |         | R | R | R | R | R | R | S | ZG1  |
| 2005-27 |         | R | R | R | R | R | R | S | ZG1  |
| 2005-28 |         | R | R | R | R | R | R | S | ZG1  |
| 2005-29 |         | R | S | R | S | R | S | S | ZB21 |
| 2005-30 |         | R | R | R | R | R | R | S | ZG1  |
| 2005-31 |         | R | R | R | R | R | R | S | ZG1  |
| 2005-32 |         | R | R | R | R | R | R | S | ZG1  |
| 2005-33 |         | R | R | R | R | R | R | S | ZG1  |
| 2005-34 |         | R | R | R | R | R | R | S | ZG1  |
| 2005-35 |         | R | R | R | R | R | R | S | ZG1  |
| 2005-36 |         | R | R | R | R | R | R | S | ZG1  |
| 2005-37 | Suzhou  | R | R | R | R | R | R | S | ZG1  |
| 2005-38 |         | R | R | R | R | R | R | S | ZG1  |
| 2005-39 |         | R | R | R | R | R | R | S | ZG1  |
| 2005-40 |         | R | R | R | R | R | R | S | ZG1  |
| 2005-41 |         | R | R | R | R | S | R | S | ZE3  |
| 2005-42 |         | R | R | R | S | R | R | S | ZD7  |
| 2005-43 |         | R | R | R | R | R | R | S | ZG1  |
| 2005-44 |         | R | R | R | R | R | R | S | ZG1  |
| 2005-45 |         | R | R | S | R | R | R | S | ZC15 |
| 2005-46 |         | R | R | R | R | S | R | S | ZE3  |
| 2005-47 |         | R | R | R | R | R | R | S | ZG1  |
| 2005-48 |         | R | R | R | S | R | R | S | ZD7  |
| 2005-49 |         | R | R | R | R | R | R | S | ZG1  |
| 2005-50 |         | R | R | R | R | S | R | S | ZE3  |
| 2005-51 |         | R | R | R | R | R | R | S | ZG1  |
| 2005-52 |         | R | R | R | R | R | R | S | ZG1  |
| 2005-53 |         | R | R | R | R | S | R | S | ZE3  |
| 2005-54 |         | R | R | R | R | R | R | S | ZG1  |
| 2005-55 |         | R | R | R | S | R | R | S | ZD7  |
| 2005-56 | Xuzhou  | R | S | S | R | R | S | S | ZB13 |
| 2005-57 |         | R | R | R | R | R | R | S | ZG1  |

|         |         |   |   |   |   |   |   |   |      |
|---------|---------|---|---|---|---|---|---|---|------|
| 2005-58 |         | R | R | R | R | R | R | S | ZG1  |
| 2005-59 |         | R | R | R | R | R | R | S | ZG1  |
| 2005-60 |         | R | R | R | R | R | R | S | ZG1  |
| 2005-61 |         | R | R | R | R | R | R | S | ZG1  |
| 2005-62 |         | R | S | R | R | R | R | S | ZB31 |
| 2005-63 |         | R | S | S | R | R | R | S | ZB15 |
| 2005-64 |         | R | S | S | R | R | R | S | ZB15 |
| 2005-65 |         | R | R | S | R | R | R | S | ZC15 |
| 2005-66 |         | R | R | R | R | R | R | S | ZG1  |
| 2005-67 |         | R | R | S | R | R | S | S | ZC13 |
| 2005-68 |         | R | R | R | R | R | S | S | ZF1  |
| 2005-69 |         | R | R | S | R | R | S | S | ZC13 |
| 2005-70 |         | R | R | S | R | R | R | S | ZC15 |
| 2005-71 |         | R | R | S | R | R | R | S | ZC15 |
| 2005-72 |         | R | R | S | R | R | S | S | ZC13 |
| 2005-73 |         | R | R | S | R | R | R | S | ZC15 |
| 2005-74 |         | R | R | S | R | R | S | S | ZC13 |
| 2005-75 |         | R | R | S | R | R | R | S | ZC15 |
| 2005-76 |         | R | R | R | R | R | R | S | ZG1  |
| 2005-77 |         | R | R | R | R | R | R | S | ZG1  |
| 2005-78 |         | R | S | R | R | R | R | S | ZB31 |
| 2005-79 |         | R | R | S | R | R | S | S | ZC13 |
| 2005-80 |         | R | R | R | R | R | R | S | ZG1  |
| 2005-81 |         | R | R | R | R | R | R | S | ZG1  |
| 2005-82 |         | R | S | R | R | R | R | S | ZB31 |
| 2006-1  | Xuzhou  | R | S | S | S | R | S | S | ZB5  |
| 2006-2  |         | R | S | S | R | R | R | S | ZB15 |
| 2006-3  |         | R | S | S | R | R | S | S | ZB13 |
| 2006-4  |         | R | S | S | R | R | S | S | ZB13 |
| 2006-5  |         | R | S | S | R | R | S | S | ZB13 |
| 2006-6  |         | R | R | R | R | R | R | S | ZG1  |
| 2006-7  |         | R | R | R | R | R | R | S | ZG1  |
| 2006-8  | Nanjing | R | R | S | R | R | S | S | ZC13 |
| 2006-9  |         | R | R | S | R | R | S | S | ZC13 |
| 2006-10 |         | R | R | S | R | R | R | S | ZC15 |
| 2006-11 |         | R | R | R | R | R | R | S | ZG1  |
| 2006-12 |         | R | R | R | R | R | R | S | ZG1  |
| 2006-13 |         | R | R | R | R | R | R | S | ZG1  |
| 2006-14 |         | R | R | R | R | R | R | S | ZG1  |
| 2006-15 |         | R | R | R | R | R | R | S | ZG1  |
| 2006-16 |         | R | R | R | R | R | R | S | ZG1  |
| 2006-17 |         | R | R | R | R | R | R | S | ZG1  |
| 2006-18 |         | R | R | R | R | R | R | S | ZG1  |
| 2006-19 |         | R | R | R | R | R | R | S | ZG1  |
| 2006-20 |         | R | R | R | R | R | R | S | ZG1  |
| 2006-21 |         | R | R | R | R | R | R | S | ZG1  |
| 2006-22 |         | R | R | R | R | R | R | S | ZG1  |
| 2006-23 |         | R | R | R | R | R | R | S | ZG1  |

|         |           |   |   |   |   |   |   |   |      |
|---------|-----------|---|---|---|---|---|---|---|------|
| 2006-24 |           | R | R | R | R | R | R | S | ZG1  |
| 2006-25 |           | R | R | R | R | R | R | S | ZG1  |
| 2006-26 |           | R | R | R | R | S | R | S | ZE3  |
| 2006-27 |           | R | R | R | R | S | R | S | ZE3  |
| 2006-28 |           | R | R | R | R | R | R | S | ZG1  |
| 2006-29 |           | R | R | R | R | R | R | S | ZG1  |
| 2006-30 |           | R | R | R | R | R | R | S | ZG1  |
| 2006-31 |           | R | R | R | R | R | R | S | ZG1  |
| 2006-32 | Zhenjiang | R | R | R | R | R | R | S | ZG1  |
| 2006-33 |           | R | R | R | R | R | R | S | ZG1  |
| 2006-34 |           | R | R | R | R | R | R | S | ZG1  |
| 2006-35 |           | R | R | R | R | R | R | S | ZG1  |
| 2006-36 |           | R | R | R | R | R | R | S | ZG1  |
| 2006-37 |           | R | R | R | R | R | R | S | ZG1  |
| 2006-38 |           | R | R | R | R | R | R | S | ZG1  |
| 2006-39 |           | R | R | R | R | R | R | S | ZG1  |
| 2006-40 | Suzhou    | R | R | R | R | R | R | S | ZG1  |
| 2006-41 |           | R | R | R | R | R | R | S | ZG1  |
| 2007-1  |           | R | R | R | R | R | R | S | ZG1  |
| 2007-2  |           | R | R | R | R | R | R | S | ZG1  |
| 2007-3  |           | R | R | R | S | R | R | S | ZD7  |
| 2007-4  |           | R | R | R | R | R | R | S | ZG1  |
| 2007-5  |           | R | R | R | R | R | S | S | ZF1  |
| 2007-6  | Nanjing   | R | R | R | R | R | S | S | ZF1  |
| 2007-7  |           | R | S | R | R | R | S | S | ZB29 |
| 2007-8  |           | R | R | S | R | R | S | S | ZC13 |
| 2007-9  |           | R | R | R | R | R | S | S | ZF1  |
| 2007-10 |           | R | R | R | R | R | S | S | ZF1  |
| 2007-11 |           | R | R | R | R | R | S | S | ZF1  |
| 2007-12 |           | R | S | S | S | R | S | S | ZB5  |
| 2007-13 |           | R | R | R | R | R | R | S | ZG1  |
| 2007-14 |           | S | R | R | S | R | S | S | ZA53 |
| 2007-15 |           | R | S | S | S | R | S | S | ZB5  |
| 2007-16 | Nantong   | R | R | S | R | R | R | S | ZC15 |
| 2007-17 |           | S | S | S | R | R | S | S | ZA13 |
| 2007-18 |           | R | S | S | R | R | S | S | ZB13 |
| 2007-19 |           | R | R | S | R | R | R | S | ZC15 |
| 2007-20 |           | R | S | S | R | R | R | S | ZB15 |
| 2007-21 | Suzhou    | R | R | R | R | R | R | S | ZG1  |
| 2007-22 |           | R | R | R | R | R | R | S | ZG1  |
| 2007-23 |           | R | R | S | R | R | S | S | ZC13 |
| 2007-24 |           | R | R | S | R | R | R | S | ZC15 |
| 2007-25 |           | R | R | R | R | R | R | S | ZG1  |
| 2007-26 | Xuzhou    | R | R | R | R | R | R | S | ZG1  |
| 2007-27 |           | R | S | S | R | R | R | S | ZB15 |
| 2007-28 |           | R | R | S | R | R | R | S | ZC15 |
| 2007-29 |           | R | R | S | R | R | R | S | ZC15 |
| 2007-30 |           | R | S | S | R | R | S | S | ZB13 |



|         |          |   |   |   |   |   |   |      |      |
|---------|----------|---|---|---|---|---|---|------|------|
| 2007-31 |          | R | R | R | R | R | S | ZG1  |      |
| 2007-32 |          | R | R | R | R | R | S | ZG1  |      |
| 2007-33 |          | R | S | S | R | R | S | ZB13 |      |
| 2007-34 |          | R | S | S | S | R | S | ZB7  |      |
| 2007-35 |          | R | R | R | R | R | S | ZG1  |      |
| 2007-36 |          | R | R | R | R | R | S | ZG1  |      |
| 2007-37 |          | R | S | S | R | R | S | ZB15 |      |
| 2007-38 | Yancheng | R | R | R | R | R | S | ZG1  |      |
| 2007-39 |          | R | R | R | R | R | S | ZG1  |      |
| 2007-40 |          | R | R | R | R | R | S | S    | ZF1  |
| 2007-41 |          | R | R | R | R | R | S | S    | ZF1  |
| 2007-42 |          | R | R | R | R | R | R | S    | ZG1  |
| 2007-43 |          | R | R | R | R | R | S | S    | ZF1  |
| 2007-44 |          | R | R | R | R | R | R | S    | ZG1  |
| 2007-45 |          | R | R | R | R | R | S | S    | ZF1  |
| 2007-46 |          | R | R | R | R | R | R | S    | ZG1  |
| 2007-47 |          | R | R | R | R | R | S | S    | ZF1  |
| 2007-48 |          | R | R | R | R | R | S | S    | ZF1  |
| 2007-49 |          | R | R | R | S | R | S | S    | ZD5  |
| 2007-50 |          | R | R | R | R | R | S | S    | ZF1  |
| 2007-51 |          | R | R | R | R | R | R | S    | ZG1  |
| 2007-52 |          | R | R | R | R | R | S | S    | ZF1  |
| 2007-53 |          | R | R | R | R | R | S | S    | ZF1  |
| 2007-54 |          | R | R | R | S | R | S | S    | ZD5  |
| 2007-55 |          | R | R | R | R | R | S | S    | ZF1  |
| 2007-56 |          | R | R | R | R | R | S | S    | ZF1  |
| 2007-57 |          | R | R | R | S | R | S | S    | ZD5  |
| 2007-58 |          | S | R | R | R | R | S | S    | ZA61 |
| 2007-59 |          | R | R | R | R | R | S | S    | ZF1  |
| 2007-60 |          | R | R | R | R | R | S | S    | ZF1  |
| 2007-61 |          | R | R | R | R | R | S | S    | ZF1  |
| 2007-62 |          | R | R | R | R | R | S | S    | ZF1  |
| 2007-63 |          | R | R | R | R | R | R | S    | ZG1  |
| 2007-64 |          | R | R | R | R | R | R | S    | ZG1  |
| 2007-65 |          | R | R | R | R | R | S | S    | ZF1  |
| 2007-66 |          | R | R | R | R | R | R | S    | ZG1  |
| 2007-67 |          | R | R | R | R | R | R | S    | ZG1  |
| 2007-68 |          | R | S | R | S | R | S | S    | ZB21 |
| 2007-69 |          | S | S | S | S | R | S | S    | ZA5  |
| 2009-1  | Nanjing  | R | R | R | R | R | S | ZG1  |      |
| 2009-2  |          | R | R | S | R | R | R | S    | ZC15 |
| 2009-3  |          | R | R | R | R | R | R | S    | ZG1  |
| 2009-4  |          | R | R | R | R | R | R | S    | ZG1  |
| 2009-5  |          | R | R | R | R | R | R | S    | ZG1  |
| 2009-6  |          | R | R | R | S | R | R | S    | ZD7  |
| 2009-7  |          | S | S | S | S | R | R | S    | ZA7  |
| 2009-8  |          | R | R | R | R | R | R | S    | ZG1  |
| 2009-9  | Nantong  | R | R | R | R | R | R | S    | ZG1  |

|         |        |   |   |   |   |   |   |   |      |
|---------|--------|---|---|---|---|---|---|---|------|
| 2009-10 |        | R | S | S | R | R | R | S | ZB15 |
| 2009-11 |        | R | R | R | R | R | R | S | ZG1  |
| 2009-12 |        | R | R | R | S | R | R | S | ZD7  |
| 2009-13 |        | R | R | R | S | S | R | S | ZD3  |
| 2009-14 |        | R | R | R | R | S | R | S | ZE3  |
| 2009-15 |        | R | S | S | R | R | S | S | ZB13 |
| 2009-16 |        | R | S | S | S | R | R | S | ZB7  |
| 2009-17 |        | R | R | S | R | R | S | S | ZC13 |
| 2009-18 |        | R | R | R | R | R | R | S | ZG1  |
| 2009-19 |        | R | S | S | R | R | R | S | ZB15 |
| 2009-20 |        | R | S | S | R | R | R | S | ZB15 |
| 2009-21 |        | R | S | R | R | R | R | S | ZB31 |
| 2009-22 |        | R | R | R | R | R | R | S | ZG1  |
| 2009-23 |        | R | R | S | R | R | R | S | ZC15 |
| 2009-24 |        | R | R | R | R | R | R | S | ZG1  |
| 2009-25 |        | R | S | R | R | R | R | S | ZB31 |
| 2009-26 |        | R | R | R | R | R | R | S | ZG1  |
| 2009-27 |        | R | R | R | R | S | R | S | ZE3  |
| 2009-28 |        | R | R | R | R | R | S | S | ZF1  |
| 2009-29 |        | R | R | R | R | R | R | S | ZG1  |
| 2009-30 |        | R | S | S | R | R | S | S | ZB13 |
| 2009-31 |        | R | R | S | R | R | S | S | ZC13 |
| 2009-32 | Suzhou | R | R | R | R | R | R | S | ZG1  |
| 2009-33 |        | R | R | R | S | R | R | S | ZD7  |
| 2009-34 |        | R | R | S | R | R | R | S | ZC15 |
| 2009-35 |        | R | S | R | R | S | R | S | ZB27 |
| 2009-36 |        | R | S | R | S | S | S | S | ZB17 |
| 2009-37 |        | R | R | R | S | S | R | S | ZD3  |
| 2009-38 |        | R | S | R | S | S | R | S | ZB19 |
| 2009-39 |        | R | R | S | R | R | R | S | ZC15 |
| 2009-40 |        | R | S | R | R | R | R | S | ZB31 |
| 2009-41 |        | R | R | S | R | R | R | S | ZC15 |
| 2009-42 |        | R | R | R | R | R | R | S | ZG1  |
| 2009-43 |        | R | S | R | R | R | R | S | ZB31 |
| 2009-44 |        | R | S | S | R | R | R | S | ZB15 |
| 2009-45 |        | R | R | R | R | R | R | S | ZG1  |
| 2009-46 |        | R | R | R | R | R | R | S | ZG1  |
| 2009-47 |        | R | R | R | R | R | R | S | ZG1  |
| 2009-48 |        | R | R | R | R | R | R | S | ZG1  |
| 2009-49 | Xuzhou | R | S | S | R | R | R | S | ZB15 |
| 2009-50 |        | R | S | S | R | R | R | S | ZB15 |
| 2009-51 |        | R | R | R | R | R | R | S | ZG1  |
| 2009-52 |        | R | S | R | S | R | S | S | ZB21 |
| 2009-53 |        | R | S | R | R | R | R | S | ZB31 |
| 2009-54 |        | R | R | S | R | R | R | S | ZC15 |
| 2009-55 |        | R | R | R | R | R | R | S | ZG1  |
| 2009-56 |        | R | S | R | S | R | R | S | ZB23 |
| 2009-57 |        | R | R | R | R | R | R | S | ZG1  |

|         |          |   |   |   |   |   |   |   |      |
|---------|----------|---|---|---|---|---|---|---|------|
| 2009-58 |          | R | R | S | R | S | S | S | ZC9  |
| 2009-59 |          | S | R | R | S | R | R | S | ZA55 |
| 2009-60 |          | R | S | S | R | R | R | S | ZB15 |
| 2009-61 |          | R | R | R | R | R | R | S | ZG1  |
| 2009-62 |          | R | S | S | R | R | R | S | ZB15 |
| 2009-63 |          | R | S | R | R | R | R | S | ZB31 |
| 2009-64 | Yancheng | R | R | S | S | R | S | S | ZC5  |
| 2009-65 |          | R | R | S | S | S | R | S | ZC3  |
| 2009-66 |          | R | R | R | R | S | R | S | ZE3  |
| 2009-67 |          | R | S | S | R | R | S | S | ZB13 |
| 2009-68 |          | R | R | R | R | R | R | S | ZG1  |
| 2009-69 |          | R | S | S | R | R | R | S | ZB15 |
| 2009-70 |          | R | R | R | R | R | R | S | ZG1  |
| 2010-1  |          | R | R | R | R | R | R | S | ZG1  |
| 2010-2  |          | R | R | S | R | R | R | S | ZC15 |
| 2010-3  |          | R | R | S | R | R | R | S | ZC15 |
| 2010-4  |          | R | S | S | R | R | R | S | ZB15 |
| 2010-5  |          | R | S | S | R | R | R | S | ZB15 |
| 2010-6  | Xuzhou   | R | R | R | R | R | R | S | ZG1  |
| 2010-7  |          | R | R | R | R | R | R | S | ZG1  |
| 2010-8  |          | R | R | R | R | R | R | S | ZG1  |
| 2010-9  |          | R | R | S | R | R | R | S | ZC15 |
| 2010-10 |          | R | R | S | R | S | R | S | ZC11 |
| 2010-11 |          | R | R | S | S | S | S | S | ZC1  |
| 2010-12 |          | R | R | R | S | S | S | S | ZD1  |
| 2010-13 |          | R | S | S | R | S | S | S | ZB9  |
| 2010-14 |          | R | R | R | R | R | R | S | ZG1  |
| 2010-15 |          | R | R | R | R | R | R | S | ZG1  |
| 2010-16 |          | R | R | R | R | R | R | S | ZG1  |
| 2010-17 |          | R | R | R | R | R | R | S | ZG1  |
| 2010-18 |          | R | R | R | R | R | R | S | ZG1  |
| 2010-19 | Suzhou   | R | R | R | R | R | R | S | ZG1  |
| 2010-20 |          | R | R | R | R | R | R | S | ZG1  |
| 2010-21 |          | R | R | R | R | R | S | S | ZF1  |
| 2010-22 |          | R | R | R | R | S | R | S | ZE3  |
| 2010-23 |          | R | R | R | R | R | R | S | ZG1  |
| 2010-24 |          | R | R | S | R | R | R | S | ZC15 |
| 2010-25 |          | R | R | R | R | R | R | S | ZG1  |
| 2010-26 |          | R | R | R | R | R | R | S | ZG1  |
| 2010-27 |          | R | R | R | R | R | R | S | ZG1  |
| 2010-28 |          | R | R | R | S | R | R | S | ZD7  |
| 2010-29 |          | R | R | R | R | S | S | S | ZE1  |
| 2010-30 |          | R | R | S | R | S | R | S | ZC11 |
| 2010-31 | Nanjing  | R | S | R | S | S | S | S | ZB17 |
| 2010-32 |          | R | R | R | R | S | R | S | ZE3  |
| 2010-33 |          | R | R | R | R | S | S | S | ZE1  |
| 2010-34 |          | R | R | R | R | S | R | S | ZE3  |
| 2010-35 |          | R | R | R | S | S | S | S | ZD1  |

|         |          |   |   |   |   |   |   |     |      |
|---------|----------|---|---|---|---|---|---|-----|------|
| 2010-36 |          | R | S | S | S | S | S | S   | ZB1  |
| 2010-37 |          | R | S | S | S | S | S | S   | ZB1  |
| 2010-38 |          | R | R | R | S | S | R | S   | ZD3  |
| 2010-39 |          | R | R | R | R | S | R | S   | ZE1  |
| 2010-40 |          | R | S | R | R | R | R | S   | ZB31 |
| 2010-41 |          | R | S | S | S | S | S | S   | ZB1  |
| 2010-42 |          | R | R | R | S | S | S | S   | ZD1  |
| 2010-43 |          | R | S | R | S | S | S | S   | ZB17 |
| 2010-44 | Yancheng | R | R | R | R | R | R | S   | ZG1  |
| 2010-45 |          | R | R | R | R | R | R | S   | ZG1  |
| 2010-46 |          | S | S | R | S | S | S | S   | ZA17 |
| 2010-47 |          | R | R | R | R | R | R | S   | ZG1  |
| 2010-48 |          | R | R | R | R | R | R | S   | ZG1  |
| 2010-49 |          | R | R | R | R | R | R | S   | ZG1  |
| 2010-50 |          | R | R | S | R | R | R | S   | ZC15 |
| 2010-51 |          | R | S | S | R | R | R | S   | ZB15 |
| 2010-52 |          | R | S | R | S | S | S | S   | ZB17 |
| 2010-53 |          | R | R | R | R | R | R | S   | ZG1  |
| 2010-54 |          | R | R | R | R | S | R | S   | ZE3  |
| 2010-55 |          | R | S | R | R | R | R | S   | ZB31 |
| 2010-56 |          | R | R | R | R | R | R | S   | ZG1  |
| 2011-1  | Nanjing  | R | R | R | S | R | R | S   | ZD7  |
| 2011-2  |          | R | R | R | R | R | R | S   | ZG1  |
| 2011-3  |          | R | R | S | R | R | R | S   | ZC15 |
| 2011-4  |          | R | R | R | R | R | R | S   | ZG1  |
| 2011-5  | Nantong  | R | R | R | R | R | R | S   | ZG1  |
| 2011-6  |          | R | S | R | S | S | S | S   | ZB17 |
| 2011-7  |          | R | R | S | S | S | S | S   | ZC1  |
| 2011-8  |          | R | R | R | S | S | R | S   | ZD3  |
| 2011-9  |          | R | R | R | S | S | S | S   | ZD1  |
| 2011-10 |          | R | R | S | S | S | S | S   | ZC1  |
| 2011-11 |          | R | R | R | R | R | R | S   | ZG1  |
| 2011-12 |          | R | R | R | R | S | S | S   | ZE1  |
| 2011-13 |          | R | R | R | R | S | R | S   | ZE3  |
| 2011-14 |          | R | R | R | S | S | S | S   | ZD1  |
| 2011-15 |          | R | S | S | S | S | S | S   | ZB1  |
| 2011-16 |          | R | R | R | R | S | R | S   | ZE3  |
| 2011-17 |          | R | R | R | R | S | R | S   | ZE3  |
| 2011-18 | R        | R | R | R | S | R | S | ZE3 |      |
| 2011-19 | Suzhou   | R | R | R | R | S | S | S   | ZE1  |
| 2011-20 |          | R | R | R | R | R | R | S   | ZG1  |
| 2011-21 |          | R | R | R | S | S | S | S   | ZD1  |
| 2011-22 |          | R | R | R | R | R | R | S   | ZG1  |
| 2011-23 |          | R | R | R | R | S | R | S   | ZE3  |
| 2011-24 |          | R | R | R | R | R | R | S   | ZG1  |
| 2011-25 | Xuzhou   | R | R | R | S | S | S | S   | ZD1  |
| 2011-26 |          | R | R | R | S | S | S | S   | ZD1  |
| 2011-27 |          | R | R | R | S | R | S | S   | ZD5  |

|         |                   |   |   |   |   |   |   |   |      |
|---------|-------------------|---|---|---|---|---|---|---|------|
| 2011-28 |                   | R | S | R | S | S | S | S | ZB17 |
| 2011-29 |                   | R | R | R | S | S | S | S | ZD1  |
| 2011-30 |                   | R | R | R | S | S | S | S | ZD1  |
| 2011-31 |                   | R | R | S | R | R | R | S | ZC15 |
| 2011-32 |                   | R | R | S | R | R | R | S | ZC15 |
| 2011-33 |                   | S | R | R | R | R | R | S | ZG1  |
| 2011-34 |                   | R | R | S | R | R | R | S | ZC15 |
| 2011-35 |                   | R | R | S | R | R | R | S | ZC15 |
| 2011-36 |                   | R | S | S | R | R | R | S | ZB15 |
| 2011-37 |                   | R | R | S | S | R | R | S | ZC7  |
| 2011-38 |                   | R | R | R | R | S | R | S | ZE3  |
| 2011-39 |                   | R | R | R | R | R | R | S | ZG1  |
| 2011-40 |                   | R | R | S | R | R | R | S | ZC15 |
| 2011-41 |                   | R | R | R | S | S | R | S | ZD3  |
| 2011-42 |                   | R | R | S | R | R | R | S | ZC15 |
| 2011-43 |                   | R | R | S | S | S | S | S | ZC1  |
| 2011-44 |                   | R | R | R | S | S | S | S | ZD1  |
| 2011-45 |                   | R | R | R | R | R | R | S | ZG1  |
| 2011-46 |                   | R | R | S | S | S | S | S | ZC1  |
| 2011-47 |                   | S | R | S | S | S | S | S | ZA33 |
| 2011-48 |                   | R | R | R | S | S | S | S | ZD1  |
| 2011-49 |                   | R | R | R | S | S | S | S | ZD1  |
| 2011-50 |                   | R | R | R | S | S | S | S | ZD1  |
| 2011-51 |                   | R | R | R | R | R | R | S | ZG1  |
| 2011-52 |                   | R | S | R | S | S | S | S | ZB17 |
| 2011-53 |                   | R | R | R | R | R | R | S | ZG1  |
| 2011-54 |                   | R | R | R | S | S | S | S | ZD1  |
| 2011-55 |                   | R | R | R | R | S | R | S | ZE3  |
| 2011-56 |                   | R | R | S | S | S | S | S | ZC1  |
| 2011-57 |                   | R | R | R | S | S | S | S | ZD1  |
| 2011-58 |                   | R | R | R | S | S | S | S | ZD1  |
| 2011-59 |                   | R | R | R | S | S | R | S | ZD3  |
| 2011-60 |                   | R | R | S | S | S | S | S | ZC1  |
| 2011-61 |                   | R | R | R | R | S | R | S | ZE3  |
| 2011-62 | Yancheng          | R | R | R | S | S | R | S | ZD3  |
| 2011-63 |                   | R | R | S | S | S | S | S | ZC1  |
| 2011-64 |                   | R | R | S | R | R | R | S | ZC15 |
| 2011-65 |                   | R | R | S | R | R | R | S | ZC15 |
| 2011-66 |                   | R | R | S | R | R | R | S | ZC15 |
| 2011-67 |                   | R | R | S | S | R | R | S | ZC7  |
| 2011-68 |                   | R | R | R | S | S | S | S | ZD1  |
| 2011-69 |                   | R | R | R | R | R | R | S | ZG1  |
| 2011-70 |                   | R | R | R | R | R | R | S | ZG1  |
| 2011-71 |                   | R | R | R | R | R | R | S | ZG1  |
| 2011-72 |                   | R | R | R | R | R | R | S | ZG1  |
| 2011-73 |                   | R | R | R | R | S | R | S | ZE3  |
| 2011-74 |                   | R | R | R | S | S | S | S | ZD1  |
| 2012-1  | <u>Lianyungan</u> | R | S | S | R | R | R | S | ZB15 |

|         |           |   |   |   |   |   |   |   |      |
|---------|-----------|---|---|---|---|---|---|---|------|
| 2012-2  | g         | R | S | S | R | R | S | S | ZB13 |
| 2012-3  |           | R | R | R | R | R | R | S | ZG1  |
| 2012-4  |           | R | R | R | R | R | R | S | ZG1  |
| 2012-5  |           | R | S | S | S | S | S | S | ZB1  |
| 2012-6  |           | R | R | R | R | R | R | S | ZG1  |
| 2012-7  |           | R | R | R | R | R | R | S | ZG1  |
| 2012-8  |           | R | R | R | R | R | R | S | ZG1  |
| 2012-9  |           | R | R | R | R | R | R | S | ZG1  |
| 2012-10 |           | R | R | R | R | R | R | S | ZG1  |
| 2012-11 |           | R | R | S | R | R | R | S | ZC15 |
| 2012-12 |           | R | R | R | R | R | R | S | ZG1  |
| 2012-13 |           | R | R | R | R | S | R | S | ZE3  |
| 2012-14 |           | R | S | S | R | R | R | S | ZB15 |
| 2012-15 |           | R | S | S | R | R | R | S | ZB15 |
| 2012-16 |           | R | R | R | R | R | R | S | ZG1  |
| 2012-17 |           | R | R | S | R | R | R | S | ZC15 |
| 2012-18 |           | R | S | S | R | R | R | S | ZB15 |
| 2012-19 |           | R | S | S | S | R | R | S | ZB7  |
| 2012-20 |           | R | S | R | R | R | R | S | ZB31 |
| 2012-21 |           | R | R | R | R | R | R | S | ZG1  |
| 2012-22 | Changzhou | R | R | S | R | R | R | S | ZC15 |
| 2012-23 |           | R | S | S | R | R | R | S | ZB15 |
| 2012-24 |           | R | S | S | R | R | R | S | ZB15 |
| 2012-25 |           | R | S | S | R | R | R | S | ZB15 |
| 2012-26 |           | R | R | R | R | R | R | S | ZG1  |
| 2012-27 |           | R | S | S | R | R | R | S | ZB15 |
| 2012-28 |           | R | R | S | R | R | R | S | ZC15 |
| 2012-29 |           | R | R | S | R | R | R | S | ZC15 |
| 2012-30 |           | R | R | S | R | R | R | S | ZC15 |
| 2012-31 |           | R | R | S | R | R | R | S | ZC15 |
| 2012-32 |           | R | R | S | R | R | R | S | ZC15 |
| 2012-33 |           | R | R | S | R | R | R | S | ZC15 |
| 2012-34 |           | R | R | S | R | R | S | S | ZC13 |
| 2012-35 |           | R | S | S | R | R | R | S | ZB15 |
| 2012-36 |           | R | R | S | S | R | R | S | ZB7  |
| 2012-37 |           | R | R | S | R | R | R | S | ZC15 |
| 2012-38 |           | R | R | S | R | R | R | S | ZC15 |
| 2012-39 |           | R | S | S | R | R | R | S | ZB15 |
| 2012-40 |           | R | R | S | R | R | R | S | ZC15 |
| 2012-41 |           | R | R | S | R | R | R | S | ZC15 |
| 2012-42 |           | R | R | S | R | R | R | S | ZC15 |
| 2012-43 |           | R | R | S | R | R | R | S | ZC15 |
| 2012-44 |           | R | R | S | R | R | R | S | ZC15 |
| 2012-45 |           | R | R | S | R | R | R | S | ZC15 |
| 2012-46 |           | R | R | S | R | R | R | S | ZC15 |
| 2012-47 |           | R | S | S | R | R | R | S | ZB15 |
| 2012-48 |           | R | R | S | R | R | R | S | ZC15 |
| 2012-49 |           | R | S | S | S | S | S | S | ZB1  |

|         |                 |   |   |   |   |   |   |   |      |
|---------|-----------------|---|---|---|---|---|---|---|------|
| 2012-50 |                 | R | R | R | S | S | S | S | ZD1  |
| 2012-51 |                 | R | S | S | S | R | S | S | ZB5  |
| 2012-52 |                 | R | S | S | R | R | R | S | ZB15 |
| 2012-53 |                 | R | R | R | R | R | R | S | ZG1  |
| 2012-54 |                 | R | R | R | R | R | R | S | ZG1  |
| 2012-55 |                 | R | R | R | R | R | R | S | ZG1  |
| 2012-56 |                 | R | R | R | R | R | R | S | ZG1  |
| 2012-57 |                 | R | R | S | R | R | S | S | ZC13 |
| 2012-58 |                 | R | R | S | R | R | R | S | ZC15 |
| 2012-59 |                 | R | R | R | R | R | R | S | ZG1  |
| 2012-60 | Nanjing         | R | R | S | R | R | R | S | ZC15 |
| 2012-61 |                 | R | R | S | R | R | R | S | ZC15 |
| 2012-62 |                 | R | R | S | R | R | R | S | ZC15 |
| 2012-63 |                 | R | R | R | R | R | R | S | ZG1  |
| 2012-64 |                 | R | R | S | R | R | R | S | ZC15 |
| 2012-65 |                 | R | R | R | R | R | R | S | ZG1  |
| 2012-66 |                 | R | R | R | R | R | R | S | ZG1  |
| 2012-67 |                 | R | R | R | R | R | R | S | ZG1  |
| 2012-68 |                 | R | S | S | R | R | R | S | ZB15 |
| 2012-69 |                 | R | S | S | R | R | R | S | ZB15 |
| 2012-70 |                 | R | R | R | R | R | R | S | ZG1  |
| 2012-71 |                 | R | R | S | R | R | R | S | ZC15 |
| 2012-72 |                 | R | R | R | R | R | R | S | ZG1  |
| 2012-73 |                 | R | R | R | R | R | R | S | ZG1  |
| 2012-74 |                 | R | R | R | R | R | R | S | ZG1  |
| 2012-75 | Nantong         | R | R | R | R | R | R | S | ZG1  |
| 2012-76 |                 | R | R | S | R | R | R | S | ZC15 |
| 2012-77 |                 | R | R | R | R | R | R | S | ZG1  |
| 2012-78 |                 | R | R | S | R | R | R | S | ZC15 |
| 2012-79 |                 | R | R | R | R | R | R | S | ZG1  |
| 2012-80 |                 | R | R | R | R | R | R | S | ZG1  |
| 2012-81 |                 | R | R | R | R | R | R | S | ZG1  |
| 2012-82 |                 | R | R | S | R | S | S | S | ZC9  |
| 2012-83 |                 | R | R | R | R | R | R | S | ZG1  |
| 2012-84 |                 | R | R | R | R | R | R | S | ZG1  |
| 2012-85 |                 | R | R | S | R | R | R | S | ZC15 |
| 2012-86 |                 | R | S | S | R | R | R | S | ZB15 |
| 2012-87 | Xuzhou          | R | R | R | R | R | R | S | ZG1  |
| 2012-88 |                 | R | R | R | R | R | R | S | ZG1  |
| 2012-89 |                 | R | R | S | R | R | R | S | ZC15 |
| 2012-90 |                 | R | R | S | R | R | R | S | ZC15 |
| 2012-91 |                 | R | S | S | R | R | R | S | ZB15 |
| 2012-92 |                 | R | R | R | R | R | R | S | ZG1  |
| 2012-93 |                 | R | R | S | R | R | S | S | ZC13 |
| 2012-94 | Yancheng        | R | R | R | R | R | R | S | ZG1  |
| 2013-1  | Lianyungan<br>g | R | R | S | S | R | R | S | ZC7  |
| 2013-2  |                 | R | S | S | S | S | S | S | ZB1  |
| 2013-3  |                 | R | S | S | S | R | R | S | ZB7  |

|         |           |   |   |   |   |   |   |   |      |
|---------|-----------|---|---|---|---|---|---|---|------|
| 2013-4  |           | R | R | R | R | R | R | S | ZG1  |
| 2013-5  |           | R | R | R | R | R | R | S | ZG1  |
| 2013-6  |           | R | R | R | R | S | R | S | ZE3  |
| 2013-7  |           | R | S | S | R | R | R | S | ZB15 |
| 2013-8  |           | R | S | S | R | R | R | S | ZB15 |
| 2013-9  |           | R | R | R | R | R | R | S | ZG1  |
| 2013-10 |           | R | R | S | R | R | R | S | ZC15 |
| 2013-11 |           | R | S | S | R | R | S | S | ZB13 |
| 2013-12 |           | R | S | S | R | R | R | S | ZB15 |
| 2013-13 |           | R | R | R | R | R | R | S | ZG1  |
| 2013-14 |           | R | R | R | R | R | R | S | ZG1  |
| 2013-15 |           | R | R | R | R | R | R | S | ZG1  |
| 2013-16 |           | R | R | R | R | R | R | S | ZG1  |
| 2013-17 |           | R | R | R | R | R | R | S | ZG1  |
| 2013-18 |           | R | R | R | R | R | R | S | ZG1  |
| 2013-19 |           | R | R | R | R | R | S | S | ZG1  |
| 2013-20 |           | R | S | S | S | R | R | S | ZB7  |
| 2013-21 |           | R | R | S | R | R | R | S | ZC15 |
| 2013-22 |           | R | R | S | R | R | R | S | ZC15 |
| 2013-23 |           | R | R | R | R | R | R | S | ZG1  |
| 2013-24 |           | R | R | R | R | R | R | S | ZG1  |
| 2013-25 |           | R | S | R | R | R | R | S | ZB31 |
| 2013-26 |           | R | R | S | R | R | R | S | ZC15 |
| 2013-27 |           | R | R | S | R | R | R | S | ZC15 |
| 2013-28 |           | R | S | R | R | R | R | S | ZB31 |
| 2013-29 |           | R | S | S | S | R | R | S | ZB7  |
| 2013-30 |           | R | S | S | R | R | R | S | ZB15 |
| 2013-31 |           | R | S | S | S | R | R | S | ZB7  |
| 2013-32 |           | R | R | S | S | R | R | S | ZC7  |
| 2013-33 |           | R | S | S | S | R | R | S | ZB7  |
| 2013-34 |           | R | R | S | R | R | R | S | ZC15 |
| 2013-35 |           | R | S | S | S | R | R | S | ZB7  |
| 2013-36 |           | R | S | S | R | R | R | S | ZB15 |
| 2013-37 |           | R | S | S | R | R | R | S | ZB15 |
| 2013-38 |           | S | S | S | R | R | R | S | ZA15 |
| 2013-39 |           | R | R | S | R | R | S | S | ZC13 |
| 2013-40 |           | R | S | S | R | R | R | S | ZB15 |
| 2013-41 |           | R | S | S | R | R | R | S | ZB15 |
| 2013-42 |           | R | S | S | R | R | R | S | ZB15 |
| 2013-43 |           | R | S | S | R | R | R | S | ZB15 |
| 2013-44 | Huai'an   | R | R | S | R | R | S | S | ZC13 |
| 2013-45 |           | R | R | S | R | R | R | S | ZC15 |
| 2013-46 |           | R | R | R | R | R | R | S | ZG1  |
| 2013-47 |           | R | R | S | R | R | R | S | ZC15 |
| 2013-48 | Changzhou | R | R | S | S | R | S | S | ZC5  |
| 2013-49 |           | R | S | S | S | R | S | S | ZB5  |
| 2013-50 |           | R | S | S | S | R | S | S | ZB5  |
| 2013-51 |           | R | R | S | R | R | R | S | ZC15 |



|         |         |   |   |   |   |   |   |   |      |
|---------|---------|---|---|---|---|---|---|---|------|
| 2013-52 |         | R | S | S | R | R | R | S | ZB15 |
| 2013-53 |         | R | S | S | S | R | R | S | ZB7  |
| 2013-54 |         | R | S | S | S | R | R | S | ZB7  |
| 2013-55 |         | R | S | S | R | R | S | S | ZB13 |
| 2013-56 |         | R | S | S | S | R | S | S | ZB5  |
| 2013-57 |         | R | R | S | R | R | R | S | ZC15 |
| 2013-58 |         | R | R | S | R | R | R | S | ZC15 |
| 2013-59 |         | R | R | S | R | R | R | S | ZC15 |
| 2013-60 |         | R | S | S | S | R | R | S | ZB7  |
| 2013-61 |         | R | S | S | R | R | R | S | ZB15 |
| 2013-62 |         | R | S | S | R | R | R | S | ZB15 |
| 2013-63 |         | R | R | R | R | R | R | S | ZG1  |
| 2013-64 |         | R | S | S | S | R | S | S | ZB5  |
| 2013-65 |         | R | S | S | R | R | R | S | ZB15 |
| 2013-66 |         | R | S | S | R | R | R | S | ZB15 |
| 2013-67 |         | R | S | S | R | R | R | S | ZB15 |
| 2013-68 |         | R | R | R | R | R | R | S | ZG1  |
| 2013-69 |         | R | R | S | R | R | R | S | ZC15 |
| 2013-70 |         | R | S | S | R | R | R | S | ZB15 |
| 2013-71 |         | R | S | S | R | R | R | S | ZB15 |
| 2013-72 |         | R | R | S | R | R | R | S | ZC15 |
| 2013-73 |         | R | S | S | S | S | S | S | ZB1  |
| 2013-74 |         | R | R | R | R | R | R | S | ZG1  |
| 2013-75 |         | R | R | R | R | R | R | S | ZG1  |
| 2013-76 |         | R | S | S | S | R | R | S | ZB7  |
| 2013-77 |         | R | S | S | S | R | R | S | ZB7  |
| 2013-78 |         | R | S | R | R | R | R | S | ZB31 |
| 2013-79 |         | R | S | S | S | R | R | S | ZB7  |
| 2013-80 |         | R | S | S | R | R | R | S | ZB15 |
| 2013-81 |         | R | S | R | R | R | R | S | ZB31 |
| 2013-82 |         | R | R | S | R | R | R | S | ZC15 |
| 2013-83 |         | R | R | S | R | R | R | S | ZC15 |
| 2013-84 |         | R | S | S | R | R | S | S | ZB13 |
| 2013-85 |         | R | S | S | R | S | R | S | ZB11 |
| 2013-86 |         | R | S | S | S | R | R | S | ZB7  |
| 2013-87 |         | R | S | S | R | R | R | S | ZB15 |
| 2013-88 |         | R | S | S | R | R | R | S | ZB15 |
| 2013-89 |         | R | R | S | R | R | R | S | ZC15 |
| 2013-90 |         | R | R | S | R | R | R | S | ZC15 |
| 2013-91 |         | R | S | S | R | R | S | S | ZB13 |
| 2013-92 |         | R | S | S | R | R | R | S | ZB13 |
| 2013-93 |         | R | S | S | R | R | S | S | ZB13 |
| 2013-94 |         | R | S | S | R | R | R | S | ZB15 |
| 2013-95 |         | R | S | S | S | R | R | S | ZB7  |
| 2013-96 | Nanjing | R | R | R | R | R | R | S | ZG1  |
| 2013-97 |         | R | S | S | R | R | R | S | ZB15 |
| 2013-98 |         | R | R | R | R | R | R | S | ZG1  |
| 2013-99 |         | R | R | R | R | R | R | S | ZG1  |

|          |         |   |   |   |   |   |   |   |      |
|----------|---------|---|---|---|---|---|---|---|------|
| 2013-100 |         | R | R | S | S | R | S | S | ZC5  |
| 2013-101 |         | R | S | S | R | R | R | S | ZB15 |
| 2013-102 |         | R | S | S | S | R | S | S | ZB5  |
| 2013-103 |         | R | R | R | R | R | R | S | ZG1  |
| 2013-104 |         | R | R | S | S | R | S | S | ZC5  |
| 2013-105 |         | R | R | S | R | R | R | S | ZC15 |
| 2013-106 |         | R | S | S | R | R | R | S | ZB15 |
| 2013-107 |         | R | R | S | R | R | R | S | ZC15 |
| 2013-108 |         | R | S | S | R | R | S | S | ZB13 |
| 2013-109 |         | R | S | S | S | R | R | S | ZB7  |
| 2013-110 |         | R | S | S | S | R | R | S | ZB7  |
| 2013-111 |         | R | R | S | R | R | R | S | ZC15 |
| 2013-112 |         | R | S | S | R | R | R | S | ZB15 |
| 2013-113 |         | R | R | R | R | R | R | S | ZG1  |
| 2013-114 |         | R | S | S | S | R | R | S | ZB7  |
| 2013-115 |         | R | R | S | R | R | R | S | ZC15 |
| 2013-116 |         | R | R | S | R | R | R | S | ZC15 |
| 2013-117 |         | R | R | R | R | R | R | S | ZG1  |
| 2013-118 |         | R | R | S | R | R | R | S | ZC15 |
| 2013-119 |         | R | S | S | R | R | R | S | ZB15 |
| 2013-120 |         | R | S | S | R | R | S | S | ZB13 |
| 2013-121 |         | R | R | R | R | R | R | S | ZG1  |
| 2013-122 |         | R | R | R | R | R | R | S | ZG1  |
| 2013-123 |         | R | S | S | S | R | R | S | ZB7  |
| 2013-124 | Nantong | R | R | R | R | R | S | S | ZG1  |
| 2013-125 |         | R | S | S | R | R | R | S | ZB15 |
| 2013-126 |         | R | S | S | S | R | S | S | ZB5  |
| 2013-127 |         | R | S | S | R | R | R | S | ZB7  |
| 2013-128 |         | R | S | S | S | R | S | S | ZB5  |
| 2013-129 |         | R | S | R | R | R | R | S | ZB31 |
| 2013-130 |         | R | S | S | S | R | S | S | ZB7  |
| 2013-131 |         | R | S | S | S | R | R | S | ZB7  |
| 2013-132 |         | R | S | S | S | R | R | S | ZB7  |
| 2013-133 |         | R | S | S | R | R | R | S | ZB15 |
| 2013-134 |         | R | R | R | R | R | R | S | ZG1  |
| 2013-135 |         | R | S | S | S | R | R | S | ZB7  |
| 2013-136 |         | R | S | S | R | R | R | S | ZB15 |
| 2013-137 |         | R | R | R | R | R | R | S | ZG1  |
| 2013-138 |         | R | R | R | R | R | R | S | ZG1  |
| 2013-139 |         | R | R | R | R | R | R | S | ZG1  |
| 2013-140 | Suzhou  | R | R | R | R | R | R | S | ZG1  |
| 2013-141 |         | R | R | S | R | R | R | S | ZC15 |
| 2013-142 |         | R | R | S | R | R | R | S | ZC15 |
| 2013-143 |         | R | R | S | R | R | S | S | ZC13 |
| 2013-144 |         | R | R | S | R | R | R | S | ZC15 |
| 2013-145 |         | R | R | R | R | R | R | S | ZG1  |
| 2013-146 |         | R | R | R | R | R | S | S | ZF1  |
| 2013-147 |         | R | S | S | R | R | S | S | ZB13 |

|          |                 |   |   |   |   |   |   |   |      |
|----------|-----------------|---|---|---|---|---|---|---|------|
| 2013-148 |                 | R | R | R | R | R | R | S | ZG1  |
| 2013-149 |                 | R | R | R | R | R | R | S | ZG1  |
| 2013-150 |                 | R | S | R | R | R | R | S | ZB31 |
| 2013-151 |                 | R | R | R | R | R | S | S | ZF1  |
| 2013-152 |                 | R | S | S | R | R | S | S | ZB13 |
| 2013-153 |                 | R | R | S | R | R | R | S | ZC15 |
| 2013-154 |                 | R | R | S | S | R | R | S | ZC7  |
| 2013-155 |                 | R | R | R | R | R | R | S | ZG1  |
| 2013-156 |                 | R | S | S | R | R | R | S | ZB15 |
| 2013-157 |                 | R | R | R | R | R | R | S | ZG1  |
| 2013-158 |                 | R | R | S | R | R | R | S | ZC15 |
| 2013-159 |                 | R | R | R | R | R | R | S | ZG1  |
| 2013-160 | Xuzhou          | R | R | S | R | R | R | S | ZC15 |
| 2013-161 |                 | R | R | R | R | R | R | S | ZG1  |
| 2013-162 |                 | R | S | S | S | R | S | S | ZB5  |
| 2013-163 |                 | R | R | S | R | R | R | S | ZC15 |
| 2013-164 |                 | R | R | S | R | R | R | S | ZC15 |
| 2013-165 |                 | R | R | R | R | R | R | S | ZG1  |
| 2013-166 |                 | R | R | R | R | R | R | S | ZG1  |
| 2013-167 |                 | R | R | R | R | R | R | S | ZG1  |
| 2013-168 |                 | R | R | S | R | R | R | S | ZC15 |
| 2013-169 |                 | R | R | R | R | R | R | S | ZG1  |
| 2013-170 |                 | R | R | R | R | R | R | S | ZG1  |
| 2013-171 | Yancheng        | R | R | R | R | R | R | S | ZG1  |
| 2013-172 |                 | R | R | R | R | R | R | S | ZG1  |
| 2013-173 |                 | R | R | R | R | R | R | S | ZG1  |
| 2013-174 | Yangzhou        | R | R | R | R | R | R | S | ZG1  |
| 2013-175 |                 | R | R | R | R | R | S | S | ZF1  |
| 2014-1   |                 | R | R | R | R | R | R | S | ZG1  |
| 2014-2   |                 | R | R | S | R | R | R | S | ZC15 |
| 2014-3   |                 | R | R | S | R | R | R | S | ZC15 |
| 2014-4   |                 | R | R | R | R | R | R | S | ZG1  |
| 2014-5   |                 | R | R | R | R | R | R | S | ZG1  |
| 2014-6   |                 | R | R | R | R | R | R | S | ZG1  |
| 2014-7   |                 | R | R | R | R | R | R | S | ZG1  |
| 2014-8   |                 | R | R | R | R | R | R | S | ZG1  |
| 2014-9   |                 | R | S | S | R | R | R | S | ZB15 |
| 2014-10  | Lianyungan<br>g | R | R | S | R | R | R | S | ZC15 |
| 2014-11  |                 | R | R | R | R | R | R | S | ZG1  |
| 2014-12  |                 | R | R | S | R | R | R | S | ZC15 |
| 2014-13  |                 | R | R | R | R | R | R | S | ZG1  |
| 2014-14  |                 | R | R | S | R | R | R | S | ZC15 |
| 2014-15  |                 | R | S | S | S | R | R | S | ZB7  |
| 2014-16  |                 | R | R | S | R | R | S | S | ZC13 |
| 2014-17  |                 | R | R | R | R | R | R | S | ZG1  |
| 2014-18  |                 | R | S | R | R | R | R | S | ZB31 |
| 2014-19  |                 | R | R | R | R | S | R | S | ZE3  |
| 2014-20  |                 | R | R | R | R | R | R | S | ZG1  |

|         |           |   |   |   |   |   |   |   |      |
|---------|-----------|---|---|---|---|---|---|---|------|
| 2014-21 |           | R | R | R | R | R | R | S | ZG1  |
| 2014-22 |           | R | R | R | R | R | R | S | ZG1  |
| 2014-23 |           | R | R | R | R | R | R | S | ZG1  |
| 2014-24 |           | R | R | S | R | R | R | S | ZC15 |
| 2014-25 |           | R | R | S | R | R | S | S | ZC13 |
| 2014-26 |           | R | R | S | S | R | R | S | ZC7  |
| 2014-27 |           | R | R | R | R | R | R | S | ZG1  |
| 2014-28 |           | R | R | R | R | R | R | S | ZG1  |
| 2014-29 |           | R | R | S | R | R | R | S | ZC15 |
| 2014-30 |           | R | R | S | R | R | R | S | ZC15 |
| 2014-31 |           | R | R | R | R | R | R | S | ZG1  |
| 2014-32 |           | R | R | R | R | R | R | S | ZG1  |
| 2014-33 |           | R | R | S | R | R | R | S | ZC15 |
| 2014-34 |           | R | R | R | R | R | R | S | ZG1  |
| 2014-35 |           | R | R | S | R | R | R | S | ZC15 |
| 2014-36 |           | R | R | S | R | R | R | S | ZC15 |
| 2014-37 |           | R | R | R | R | R | R | S | ZG1  |
| 2014-38 |           | R | R | R | R | R | R | S | ZG1  |
| 2014-39 |           | R | R | S | R | R | R | S | ZC15 |
| 2014-40 |           | R | R | S | R | R | S | S | ZC13 |
| 2014-41 |           | R | R | S | S | S | R | S | ZC3  |
| 2014-42 |           | R | R | S | R | R | R | S | ZC15 |
| 2014-43 |           | R | R | S | R | R | R | S | ZC15 |
| 2014-44 |           | R | R | S | R | R | R | S | ZC15 |
| 2014-45 |           | S | S | R | R | R | R | S | ZA31 |
| 2014-46 |           | S | R | S | R | R | R | S | ZA47 |
| 2014-47 |           | R | R | R | R | R | R | S | ZG1  |
| 2014-48 |           | R | R | R | R | R | R | S | ZG1  |
| 2014-49 |           | R | R | S | R | R | R | S | ZC15 |
| 2014-50 |           | R | R | R | R | R | R | S | ZG1  |
| 2014-51 |           | R | R | S | R | R | R | S | ZC15 |
| 2014-52 |           | R | R | R | R | R | R | S | ZG1  |
| 2014-53 |           | R | R | S | R | R | R | S | ZC15 |
| 2014-54 |           | R | R | R | R | R | R | S | ZG1  |
| 2014-55 |           | R | R | R | R | R | R | S | ZG1  |
| 2014-56 |           | R | R | S | R | R | R | S | ZC15 |
| 2014-57 |           | R | R | R | R | R | R | S | ZG1  |
| 2014-58 |           | R | R | S | R | R | R | S | ZC15 |
| 2014-59 |           | R | R | S | R | R | R | S | ZC15 |
| 2014-60 |           | R | R | S | R | R | R | S | ZC15 |
| 2014-61 |           | R | R | S | S | R | R | S | ZC7  |
| 2014-62 |           | R | R | S | R | R | R | S | ZC15 |
| 2014-63 |           | R | R | S | R | R | R | S | ZC15 |
| 2014-64 | Changzhou | R | R | R | R | R | R | S | ZG1  |
| 2014-65 |           | R | R | R | R | R | R | S | ZG1  |
| 2014-66 |           | R | R | R | R | R | R | S | ZG1  |
| 2014-67 |           | R | R | R | R | R | R | S | ZG1  |
| 2014-68 |           | R | R | S | R | R | R | S | ZC15 |

|          |         |   |   |   |   |   |   |   |      |
|----------|---------|---|---|---|---|---|---|---|------|
| 2014-69  |         | R | R | S | R | R | R | S | ZC15 |
| 2014-70  |         | R | R | S | R | R | R | S | ZC15 |
| 2014-71  |         | R | R | S | R | R | R | S | ZC15 |
| 2014-72  |         | R | R | S | S | R | R | S | ZC7  |
| 2014-73  |         | R | R | R | R | R | R | S | ZG1  |
| 2014-74  |         | R | R | S | R | R | R | S | ZC15 |
| 2014-75  |         | R | R | S | R | R | R | S | ZC15 |
| 2014-76  |         | R | R | R | R | R | R | S | ZG1  |
| 2014-77  |         | R | R | R | R | R | R | S | ZG1  |
| 2014-78  |         | R | R | R | R | R | S | S | ZG1  |
| 2014-79  |         | R | R | R | R | R | R | S | ZG1  |
| 2014-80  |         | R | R | R | R | R | R | S | ZG1  |
| 2014-81  |         | R | R | S | R | R | R | S | ZC15 |
| 2014-82  |         | R | R | S | R | R | R | S | ZC15 |
| 2014-83  |         | R | R | S | R | R | R | S | ZC15 |
| 2014-84  |         | R | R | S | R | R | S | S | ZC13 |
| 2014-85  |         | R | R | R | R | R | R | S | ZG1  |
| 2014-86  |         | R | R | S | R | R | R | S | ZC15 |
| 2014-87  |         | R | R | R | R | R | R | S | ZG1  |
| 2014-88  |         | R | R | R | R | R | R | S | ZG1  |
| 2014-89  |         | R | S | S | R | R | R | S | ZB15 |
| 2014-90  |         | R | R | S | R | R | R | S | ZC15 |
| 2014-91  |         | R | R | R | R | R | S | S | ZF1  |
| 2014-92  |         | R | S | S | R | R | R | S | ZB15 |
| 2014-93  |         | R | R | R | R | R | R | S | ZG1  |
| 2014-94  |         | R | R | S | R | R | R | S | ZC15 |
| 2014-95  |         | R | R | R | R | R | S | S | ZF1  |
| 2014-96  |         | R | R | S | R | R | R | S | ZC15 |
| 2014-97  |         | R | R | S | S | R | R | S | ZC7  |
| 2014-98  |         | R | R | S | R | R | R | S | ZC15 |
| 2014-99  |         | R | S | S | R | S | S | S | ZB9  |
| 2014-100 |         | R | R | R | R | R | R | S | ZG1  |
| 2014-101 |         | R | R | S | R | R | R | S | ZC15 |
| 2014-102 |         | R | R | S | R | R | R | S | ZC15 |
| 2014-103 |         | R | S | S | R | R | R | S | ZB15 |
| 2014-104 |         | R | R | S | R | R | R | S | ZC15 |
| 2014-105 |         | R | R | R | R | R | R | S | ZG1  |
| 2014-106 |         | R | R | S | R | R | R | S | ZC15 |
| 2014-107 |         | R | R | S | R | R | R | S | ZC15 |
| 2014-108 |         | R | R | S | R | R | S | S | ZC13 |
| 2014-109 |         | R | R | S | R | R | S | S | ZC13 |
| 2014-110 |         | R | R | S | R | R | R | S | ZC15 |
| 2014-111 | Nanjing | R | S | S | R | R | R | S | ZB15 |
| 2014-112 |         | R | S | S | R | R | R | S | ZB15 |
| 2014-113 |         | R | R | R | R | R | R | S | ZG1  |
| 2014-114 |         | R | S | R | R | R | R | S | ZB31 |
| 2014-115 |         | R | R | R | R | R | R | S | ZG1  |
| 2014-116 |         | S | R | R | R | R | R | S | ZA63 |

|          |         |   |   |   |   |   |   |   |      |
|----------|---------|---|---|---|---|---|---|---|------|
| 2014-117 |         | R | R | S | R | R | R | S | ZC15 |
| 2014-118 |         | R | R | S | R | R | R | S | ZC15 |
| 2014-119 |         | R | R | S | R | R | R | S | ZC15 |
| 2014-120 |         | R | R | R | R | R | R | S | ZG1  |
| 2014-121 |         | R | S | S | R | R | R | S | ZB15 |
| 2014-122 |         | R | R | S | R | R | S | S | ZC13 |
| 2014-123 |         | R | R | R | R | R | R | S | ZG1  |
| 2014-124 |         | R | S | S | R | R | S | S | ZB13 |
| 2014-125 |         | R | R | S | R | R | R | S | ZC15 |
| 2014-126 |         | R | R | R | R | R | R | S | ZG1  |
| 2014-127 |         | R | R | R | R | R | R | S | ZG1  |
| 2014-128 |         | R | R | S | R | R | R | S | ZC15 |
| 2014-129 |         | R | R | R | R | R | R | S | ZG1  |
| 2014-130 |         | R | R | S | R | R | R | S | ZC15 |
| 2014-131 |         | R | R | R | R | R | R | S | ZG1  |
| 2014-132 |         | R | R | S | R | R | R | S | ZC15 |
| 2014-133 |         | R | R | R | R | R | R | S | ZG1  |
| 2014-134 |         | R | R | S | R | R | R | S | ZC15 |
| 2014-135 |         | R | R | S | R | R | R | S | ZC15 |
| 2014-136 |         | R | R | R | R | R | R | S | ZG1  |
| 2014-137 |         | R | R | S | R | R | R | S | ZC15 |
| 2014-138 |         | R | R | S | R | R | S | S | ZC13 |
| 2014-139 |         | R | R | R | R | S | R | S | ZE3  |
| 2014-140 |         | R | R | R | R | R | R | S | ZG1  |
| 2014-141 |         | R | R | R | R | R | R | S | ZG1  |
| 2014-142 |         | R | R | S | R | R | R | S | ZC15 |
| 2014-143 |         | R | R | S | R | R | R | S | ZC15 |
| 2014-144 |         | R | R | R | R | R | R | S | ZG1  |
| 2014-145 |         | R | R | S | R | R | R | S | ZC15 |
| 2014-146 |         | R | R | R | R | R | R | S | ZG1  |
| 2014-147 |         | R | R | S | R | R | R | S | ZC15 |
| 2014-148 | Nantong | R | R | R | R | R | R | S | ZG1  |
| 2014-149 |         | R | R | R | R | R | R | S | ZG1  |
| 2014-150 |         | R | R | R | R | R | R | S | ZG1  |
| 2014-151 |         | R | R | R | R | R | R | S | ZG1  |
| 2014-152 |         | R | R | R | R | R | R | S | ZG1  |
| 2014-153 |         | R | R | R | R | R | R | S | ZG1  |
| 2014-154 |         | R | R | R | R | R | R | S | ZG1  |
| 2014-155 |         | R | R | R | R | R | R | S | ZG1  |
| 2014-156 |         | R | R | R | R | R | R | S | ZG1  |
| 2014-157 |         | R | R | R | R | R | R | S | ZG1  |
| 2014-158 |         | R | R | R | R | R | S | S | ZF1  |
| 2014-159 | Xuzhou  | R | R | R | R | R | R | S | ZG1  |
| 2014-160 |         | R | R | S | R | R | R | S | ZC15 |
| 2014-161 |         | R | R | R | R | R | R | S | ZG1  |
| 2014-162 |         | R | R | R | R | R | R | S | ZG1  |
| 2014-163 |         | R | R | S | R | R | R | S | ZC15 |
| 2014-164 |         | R | R | R | R | R | R | S | ZG1  |

|          |           |   |   |   |   |   |   |   |      |
|----------|-----------|---|---|---|---|---|---|---|------|
| 2014-165 |           | R | R | S | R | R | R | S | ZC15 |
| 2014-166 |           | R | R | R | R | R | R | S | ZG1  |
| 2014-167 |           | R | R | S | S | S | R | S | ZC3  |
| 2014-168 |           | R | R | R | R | R | R | S | ZG1  |
| 2014-169 |           | R | R | S | R | R | R | S | ZC15 |
| 2014-170 |           | R | R | S | S | R | R | S | ZC7  |
| 2014-171 |           | R | S | S | R | R | S | S | ZB13 |
| 2014-172 |           | R | R | S | S | R | R | S | ZC7  |
| 2014-173 |           | R | S | S | S | R | R | S | ZB7  |
| 2014-174 |           | R | S | S | R | R | R | S | ZB15 |
| 2014-175 |           | R | S | S | S | R | S | S | ZB5  |
| 2014-176 |           | R | S | R | R | R | R | S | ZB31 |
| 2014-177 |           | R | S | S | S | R | S | S | ZB5  |
| 2014-178 |           | S | S | S | S | R | S | S | ZA5  |
| 2014-179 |           | R | R | R | R | R | R | S | ZG1  |
| 2014-180 |           | R | R | S | R | R | R | S | ZC15 |
| <hr/>    |           |   |   |   |   |   |   |   |      |
| 2014-181 |           | R | R | S | R | R | R | S | ZC15 |
| 2014-182 |           | R | R | R | R | R | R | S | ZG1  |
| 2014-183 | Yancheng  | R | R | R | R | R | R | S | ZG1  |
| 2014-184 |           | R | R | R | R | R | R | S | ZG1  |
| 2014-185 |           | R | R | S | S | R | R | S | ZC7  |
| <hr/>    |           |   |   |   |   |   |   |   |      |
| 2014-186 |           | R | R | S | R | R | R | S | ZC15 |
| 2014-187 |           | R | R | R | R | R | R | S | ZG1  |
| 2014-188 | Yangzhou  | R | R | R | R | R | R | S | ZG1  |
| 2014-189 |           | R | R | R | R | R | R | S | ZG1  |
| 2014-190 |           | R | R | S | R | R | R | S | ZC15 |
| <hr/>    |           |   |   |   |   |   |   |   |      |
| 2014-191 |           | R | R | R | R | R | R | S | ZG1  |
| 2014-192 |           | R | R | S | S | R | R | S | ZC7  |
| 2014-193 |           | R | R | S | R | R | R | S | ZC15 |
| 2014-194 | Zhenjiang | R | R | R | R | R | R | S | ZG1  |
| 2014-195 |           | R | R | S | R | R | R | S | ZC15 |
| 2014-196 |           | R | R | R | R | R | R | S | ZG1  |
| 2014-197 |           | R | R | S | S | R | R | S | ZB7  |
| 2014-198 |           | R | R | R | R | R | R | S | ZG1  |
| <hr/>    |           |   |   |   |   |   |   |   |      |
| 2015-1   |           | R | R | R | R | R | R | S | ZG1  |
| 2015-2   |           | R | R | R | R | R | R | S | ZG1  |
| 2015-3   |           | R | R | R | R | R | R | S | ZG1  |
| 2015-4   |           | R | R | S | R | R | R | S | ZC15 |
| 2015-5   |           | R | S | R | R | R | R | S | ZB31 |
| 2015-6   |           | R | R | R | R | R | R | S | ZG1  |
| 2015-7   | Xuzhou    | R | R | S | R | R | R | S | ZC15 |
| 2015-8   |           | R | R | R | R | R | R | S | ZG1  |
| 2015-9   |           | R | S | R | R | R | R | S | ZB31 |
| 2015-10  |           | R | R | R | R | R | S | S | ZG1  |
| 2015-11  |           | R | R | S | S | R | R | S | ZC7  |
| 2015-12  |           | R | R | R | R | R | R | S | ZG1  |
| 2015-13  |           | R | R | S | R | R | R | S | ZC15 |
| 2015-14  |           | R | S | R | R | R | R | S | ZB31 |

|         |         |   |   |   |   |   |   |   |      |
|---------|---------|---|---|---|---|---|---|---|------|
| 2015-15 |         | R | R | R | R | R | R | S | ZG1  |
| 2015-16 |         | R | R | S | R | R | R | S | ZC15 |
| 2015-17 |         | R | R | S | S | R | R | S | ZC7  |
| 2015-18 |         | R | S | R | R | R | R | S | ZB31 |
| 2015-19 |         | R | R | R | S | R | R | S | ZD7  |
| 2015-20 |         | R | R | R | R | S | R | S | ZE3  |
| 2015-21 |         | R | R | R | R | R | R | S | ZG1  |
| 2015-22 |         | R | R | S | R | R | R | S | ZC15 |
| 2015-23 |         | R | R | R | R | R | R | S | ZG1  |
| 2015-24 |         | R | R | R | R | R | R | S | ZG1  |
| 2015-25 |         | R | R | R | R | R | R | S | ZG1  |
| 2015-26 |         | R | R | R | R | R | R | S | ZG1  |
| 2015-27 |         | R | R | R | R | S | R | S | ZE3  |
| 2015-28 |         | R | R | R | R | R | R | S | ZG1  |
| 2015-29 |         | R | R | R | R | R | R | S | ZG1  |
| 2015-30 |         | R | S | S | S | R | R | S | ZB7  |
| 2015-31 |         | R | R | R | R | R | R | S | ZG1  |
| 2015-32 |         | R | S | S | R | R | R | S | ZB15 |
| 2015-33 |         | R | R | R | R | R | R | S | ZG1  |
| 2015-34 |         | R | R | R | S | R | R | S | ZD7  |
| 2015-35 |         | R | R | R | R | R | R | S | ZG1  |
| 2015-36 |         | R | R | R | R | S | R | S | ZE3  |
| 2015-37 |         | R | R | R | R | R | R | S | ZG1  |
| 2015-38 |         | R | R | R | R | R | R | S | ZG1  |
| 2015-39 | Huai'an | R | R | R | R | R | R | S | ZG1  |
| 2015-40 |         | R | R | S | S | R | R | S | ZC7  |
| 2015-41 |         | R | R | R | R | R | R | S | ZG1  |
| 2015-42 |         | R | R | S | R | R | R | S | ZC15 |
| 2015-43 |         | R | S | R | R | R | R | S | ZB31 |
| 2015-44 |         | R | R | R | R | R | R | S | ZG1  |
| 2015-45 |         | R | R | R | R | R | R | S | ZG1  |
| 2015-46 |         | R | R | R | R | R | S | S | ZF1  |
| 2015-47 |         | R | R | R | R | R | R | S | ZG1  |
| 2015-48 |         | R | R | R | R | R | R | S | ZG1  |
| 2015-49 |         | R | R | R | R | S | R | S | ZE3  |
| 2015-50 |         | R | R | R | S | S | R | S | ZD3  |
| 2015-51 |         | R | S | S | R | R | R | S | ZB15 |
| 2015-52 |         | R | R | R | R | R | R | S | ZG1  |
| 2015-53 |         | R | R | R | R | R | R | S | ZG1  |
| 2015-54 |         | R | S | R | R | R | R | S | ZB31 |
| 2015-55 |         | R | S | S | S | R | R | S | ZB7  |
| 2015-56 |         | R | S | R | R | R | R | S | ZB31 |
| 2015-57 | Nanjing | R | S | S | S | R | R | S | ZB7  |
| 2015-58 |         | R | R | S | R | R | R | S | ZC15 |
| 2015-59 |         | R | R | R | S | R | R | S | ZD7  |
| 2015-60 |         | R | R | R | S | R | R | S | ZD7  |
| 2015-61 |         | R | R | S | R | R | R | S | ZC15 |
| 2015-62 |         | R | R | R | R | R | R | S | ZG1  |
| 2015-63 |         | R | S | S | S | R | R | S | ZB7  |



|          |                 |   |   |   |   |   |   |   |      |
|----------|-----------------|---|---|---|---|---|---|---|------|
| 2015-64  |                 | R | R | R | S | R | R | S | ZD7  |
| 2015-65  |                 | R | R | R | R | R | R | S | ZG1  |
| 2015-66  |                 | R | S | R | R | R | R | S | ZB31 |
| 2015-67  |                 | R | S | R | R | R | R | S | ZB31 |
| 2015-68  |                 | R | R | S | R | S | R | S | ZC11 |
| 2015-69  |                 | R | R | R | R | S | R | S | ZE3  |
| 2015-70  |                 | R | R | S | R | R | S | S | ZC13 |
| 2015-71  |                 | R | S | R | R | R | R | S | ZB31 |
| 2015-72  |                 | R | R | R | R | R | R | S | ZG1  |
| 2015-73  |                 | R | R | R | R | R | R | S | ZG1  |
| 2015-74  |                 | R | R | S | S | R | R | S | ZC7  |
| 2015-75  |                 | R | S | S | S | R | R | S | ZB7  |
| 2015-76  |                 | R | R | S | R | R | S | S | ZC13 |
| 2015-77  |                 | R | R | S | R | R | R | S | ZC15 |
| 2015-78  |                 | R | R | R | R | R | R | S | ZG1  |
| 2015-79  |                 | R | R | R | R | R | R | S | ZG1  |
| 2015-80  |                 | R | R | R | R | R | R | S | ZG1  |
| 2015-81  |                 | R | R | R | R | R | R | S | ZG1  |
| 2015-82  |                 | R | R | S | R | R | R | S | ZC15 |
| 2015-83  |                 | R | R | R | R | R | R | S | ZG1  |
| 2015-84  |                 | R | R | R | R | R | R | S | ZG1  |
| <hr/>    |                 |   |   |   |   |   |   |   |      |
| 2015-85  |                 | R | R | R | R | R | R | S | ZG1  |
| 2015-86  |                 | R | S | R | R | R | R | S | ZB31 |
| 2015-87  |                 | R | R | R | R | S | R | S | ZE3  |
| 2015-88  |                 | R | R | R | R | S | R | S | ZE3  |
| 2015-89  |                 | R | R | R | R | R | R | S | ZG1  |
| 2015-90  |                 | R | R | R | R | R | R | S | ZG1  |
| 2015-91  |                 | R | R | R | R | R | R | S | ZG1  |
| 2015-92  |                 | R | R | R | R | R | R | S | ZG1  |
| 2015-93  | Lianyungan<br>g | R | R | R | R | R | R | S | ZG1  |
| 2015-94  |                 | R | R | S | S | R | R | S | ZC7  |
| 2015-95  |                 | R | R | R | R | R | S | S | ZF1  |
| 2015-96  |                 | R | R | S | R | S | R | S | ZC11 |
| 2015-97  |                 | R | R | R | R | R | R | S | ZG1  |
| 2015-98  |                 | R | R | R | R | R | R | S | ZG1  |
| 2015-99  |                 | R | R | S | S | S | S | S | ZC1  |
| 2015-100 |                 | R | R | R | R | S | R | S | ZE3  |
| 2015-101 |                 | R | R | R | R | R | R | S | ZG1  |
| 2015-102 |                 | R | R | S | R | R | R | S | ZC15 |
| <hr/>    |                 |   |   |   |   |   |   |   |      |
| 2015-103 |                 | R | R | S | R | R | S | S | ZC13 |
| 2015-104 |                 | R | R | S | R | R | R | S | ZC15 |
| 2015-105 |                 | R | R | S | S | R | R | S | ZC7  |
| 2015-106 |                 | S | R | R | S | S | S | S | ZA49 |
| 2015-107 | Zhenjiang       | R | R | R | R | R | R | S | ZG1  |
| 2015-108 |                 | R | R | R | R | R | R | S | ZG1  |
| 2015-109 |                 | R | S | S | R | R | R | S | ZB15 |
| 2015-110 |                 | R | R | S | R | R | R | S | ZC15 |
| 2015-111 |                 | R | S | S | S | R | R | S | ZB7  |
| 2015-112 |                 | R | R | R | R | S | R | S | ZE3  |

|          |          |   |   |   |   |   |   |   |      |
|----------|----------|---|---|---|---|---|---|---|------|
| 2015-113 |          | R | R | R | R | R | R | S | ZG1  |
| 2015-114 |          | R | S | S | R | S | R | S | ZB11 |
| 2015-115 |          | R | R | R | R | R | R | S | ZG1  |
| 2015-116 |          | R | R | R | R | R | R | S | ZG1  |
| 2015-117 |          | R | R | R | R | R | S | S | ZF1  |
| 2015-118 |          | R | R | R | R | S | S | S | ZE1  |
| 2015-119 |          | R | R | R | R | R | R | S | ZG1  |
| 2015-120 |          | R | S | S | R | R | R | S | ZB15 |
| 2015-121 |          | R | R | R | R | R | R | S | ZG1  |
| 2015-122 |          | R | S | S | S | S | S | S | ZB1  |
| 2015-123 |          | S | R | R | S | S | R | S | ZA51 |
| 2015-124 |          | S | R | R | S | S | R | S | ZA51 |
| 2015-125 |          | R | R | R | S | S | R | S | ZD3  |
| 2015-126 |          | S | S | S | S | S | R | S | ZA3  |
| 2015-127 |          | S | R | S | S | S | S | S | ZA33 |
| 2015-128 | Yancheng | R | R | R | R | R | R | S | ZG1  |
| 2015-129 |          | S | R | S | S | S | S | S | ZA33 |
| 2015-130 |          | R | R | R | R | S | R | S | ZE3  |
| 2015-131 |          | R | S | R | S | R | S | S | ZB21 |
| 2015-132 |          | R | R | R | R | S | R | S | ZE3  |
| 2015-133 |          | R | S | R | S | S | S | S | ZB17 |
| 2015-134 |          | S | R | R | S | S | R | S | ZA51 |
| 2015-135 |          | R | R | S | R | S | S | S | ZC9  |
| 2015-136 |          | R | R | R | R | R | R | S | ZG1  |
| 2015-137 |          | R | R | R | R | R | R | S | ZG1  |
| 2015-138 |          | R | R | R | R | S | R | S | ZE3  |
| 2015-139 |          | R | R | R | R | S | S | S | ZE1  |
| 2015-140 |          | R | R | R | R | S | R | S | ZE3  |
| 2015-141 |          | R | R | R | R | S | R | S | ZE3  |
| 2015-142 | Yangzhou | R | R | R | R | R | R | S | ZG1  |
| 2015-143 |          | R | R | R | R | S | R | S | ZE3  |
| 2015-144 |          | R | R | R | R | S | R | S | ZE3  |
| 2015-145 |          | R | R | R | R | S | R | S | ZE3  |
| 2015-146 |          | R | R | S | R | R | R | S | ZC15 |
| 2015-147 |          | R | R | R | R | R | R | S | ZG1  |
| 2015-148 |          | R | R | R | S | R | R | S | ZE7  |
| 2015-149 |          | R | R | R | S | R | R | S | ZD7  |
| 2015-150 |          | R | R | R | R | R | R | S | ZG1  |
| 2015-151 |          | R | R | R | R | R | R | S | ZG1  |
| 2015-152 |          | R | R | R | R | R | R | S | ZG1  |
| 2015-153 |          | R | R | R | R | R | R | S | ZG1  |
| 2015-154 |          | R | R | S | R | R | R | S | ZC15 |
| 2015-155 | Nantong  | R | R | S | R | R | S | S | ZC13 |
| 2015-156 |          | R | R | S | R | R | R | S | ZC15 |
| 2015-157 |          | R | R | R | R | R | R | S | ZG1  |
| 2015-158 |          | R | R | R | R | R | R | S | ZG1  |
| 2015-159 |          | R | S | R | R | R | R | S | ZB31 |
| 2015-160 |          | S | S | S | R | R | R | S | ZA15 |
| 2015-161 |          | R | R | R | R | R | R | S | ZG1  |

|          |           |   |   |   |   |   |   |   |      |
|----------|-----------|---|---|---|---|---|---|---|------|
| 2015-162 |           | R | R | S | R | R | R | S | ZC15 |
| 2015-163 |           | R | R | R | R | R | R | S | ZG1  |
| 2015-164 | Suzhou    | R | R | S | R | R | R | S | ZC15 |
| 2015-165 |           | R | R | R | R | R | R | S | ZG1  |
| 2015-166 |           | S | S | S | R | R | S | S | ZA13 |
| 2015-167 |           | R | S | R | R | S | R | S | ZB27 |
| 2015-168 |           | R | R | S | R | R | R | S | ZC15 |
| 2015-169 |           | R | R | R | R | R | R | S | ZG1  |
| 2015-170 |           | R | R | S | R | R | R | S | ZC15 |
| 2015-171 |           | R | R | R | R | R | R | S | ZG1  |
| 2015-172 |           | R | R | S | R | R | R | S | ZC15 |
| 2015-173 |           | R | S | R | R | R | R | S | ZB31 |
| 2015-174 |           | R | R | S | S | R | R | S | ZC7  |
| 2015-175 |           | R | R | R | R | R | R | S | ZG1  |
| 2015-176 |           | R | R | R | R | R | R | S | ZG1  |
| 2015-177 |           | R | R | R | R | R | R | S | ZG1  |
| 2015-178 |           | R | R | S | R | R | R | S | ZC15 |
| 2015-179 |           | R | R | R | R | R | R | S | ZG1  |
| 2015-180 |           | R | S | R | R | R | R | S | ZB31 |
| 2015-181 |           | R | R | R | R | R | R | S | ZG1  |
| 2015-182 |           | R | S | S | S | R | R | S | ZB7  |
| 2015-183 |           | R | R | R | R | R | R | S | ZG1  |
| 2015-184 |           | R | S | R | R | R | R | S | ZB31 |
| 2015-185 |           | R | R | R | R | R | R | S | ZG1  |
| 2015-186 |           | R | R | R | R | R | R | S | ZG1  |
| 2015-187 | Changzhou | R | R | R | R | R | S | S | ZF1  |
| 2015-188 |           | R | R | R | R | R | R | S | ZG1  |
| 2015-189 |           | R | R | R | R | R | R | S | ZG1  |
| 2015-190 |           | R | R | S | R | R | R | S | ZC15 |
| 2015-191 |           | R | R | R | R | R | R | S | ZG1  |
| 2015-192 |           | R | R | R | R | R | R | S | ZG1  |
| 2015-193 |           | R | R | R | R | R | R | S | ZG1  |
| 2015-194 |           | R | R | R | R | R | R | S | ZG1  |
| 2015-195 |           | R | R | S | R | R | R | S | ZC15 |
| 2015-196 |           | R | R | S | R | R | R | S | ZC15 |
| 2015-197 |           | R | R | R | R | R | R | S | ZG1  |
| 2015-198 |           | R | R | R | R | R | R | S | ZG1  |
| 2015-199 |           | R | R | R | R | R | R | S | ZG1  |
| 2015-200 |           | R | R | R | R | R | R | S | ZG1  |
| 2015-201 |           | R | R | R | R | R | R | S | ZG1  |
| 2015-202 |           | R | R | R | R | R | R | S | ZG1  |
| 2015-203 |           | R | R | R | R | R | R | S | ZG1  |
| 2015-204 |           | R | R | S | R | R | R | S | ZC15 |
| 2015-205 |           | R | R | R | R | R | R | S | ZG1  |
| 2015-206 |           | R | R | S | R | R | R | S | ZC15 |
| 2015-207 |           | R | R | S | R | R | R | S | ZC15 |
| 2015-208 |           | R | R | R | R | R | R | S | ZG1  |
| 2015-209 |           | R | R | R | R | S | R | S | ZE3  |

|          |         |   |   |   |   |   |   |   |      |
|----------|---------|---|---|---|---|---|---|---|------|
| 2015-210 |         | R | R | R | R | R | R | S | ZG1  |
| 2015-211 |         | R | R | R | R | R | R | S | ZG1  |
| 2015-212 |         | R | R | S | R | R | R | S | ZC15 |
| 2015-213 |         | R | R | S | R | R | R | S | ZC15 |
| 2015-214 |         | R | R | S | R | R | R | S | ZC15 |
| 2016-1   |         | R | R | R | R | R | R | S | ZG1  |
| 2016-2   |         | R | R | S | R | R | R | S | ZC15 |
| 2016-3   |         | R | R | S | S | R | S | S | ZC5  |
| 2016-4   |         | R | R | S | R | R | S | S | ZC13 |
| 2016-5   |         | S | R | S | S | S | S | S | ZA33 |
| 2016-6   |         | R | R | R | R | R | R | S | ZG1  |
| 2016-7   |         | R | R | R | R | S | R | S | ZE3  |
| 2016-8   |         | R | R | S | R | R | R | S | ZC15 |
| 2016-9   |         | R | R | R | S | R | R | S | ZD7  |
| 2016-10  |         | S | S | S | S | S | S | S | ZA1  |
| 2016-11  | Huai'an | R | R | S | R | R | R | S | ZC15 |
| 2016-12  |         | R | R | R | R | R | R | S | ZG1  |
| 2016-13  |         | R | R | S | R | R | R | S | ZC15 |
| 2016-14  |         | R | R | S | R | R | R | S | ZC15 |
| 2016-15  |         | R | S | R | R | R | R | S | ZB31 |
| 2016-16  |         | S | S | S | S | S | S | S | ZA1  |
| 2016-17  |         | S | R | R | R | S | R | S | ZA59 |
| 2016-18  |         | R | S | S | S | S | R | S | ZB3  |
| 2016-19  |         | S | R | R | S | S | R | S | ZA51 |
| 2016-20  |         | R | R | R | R | R | R | S | ZG1  |
| 2016-21  |         | S | R | R | S | S | S | S | ZA49 |
| 2016-22  |         | R | R | R | S | R | R | S | ZD7  |
| 2016-23  |         | R | R | S | R | R | R | S | ZC15 |
| 2016-24  |         | R | R | R | R | R | S | S | ZF1  |
| 2016-25  |         | R | R | S | R | R | R | S | ZC15 |
| 2016-26  |         | R | R | S | S | R | R | S | ZC7  |
| 2016-27  | Nanjing | R | S | R | R | R | R | S | ZB31 |
| 2016-28  |         | R | R | R | S | R | R | S | ZD7  |
| 2016-29  |         | R | R | S | R | R | R | S | ZC15 |
| 2016-30  |         | R | S | S | R | R | S | S | ZB13 |
| 2016-31  |         | R | R | S | R | S | R | S | ZC11 |
| 2016-32  |         | R | R | R | R | S | R | S | ZE3  |
| 2016-33  |         | R | R | S | R | R | R | S | ZC15 |
| 2016-34  |         | R | R | R | R | S | R | S | ZE3  |
| 2016-35  |         | R | R | R | R | R | R | S | ZG1  |
| 2016-36  |         | R | R | S | R | R | R | S | ZC15 |
| 2016-37  |         | R | R | R | R | R | R | S | ZG1  |
| 2016-38  | Xuzhou  | R | R | R | R | R | R | S | ZG1  |
| 2016-39  |         | R | R | R | R | R | R | S | ZG1  |
| 2016-40  |         | R | R | S | S | R | R | S | ZC7  |
| 2016-41  |         | R | R | S | R | R | R | S | ZC15 |
| 2016-42  |         | R | R | R | R | R | R | S | ZG1  |
| 2016-43  |         | R | R | R | R | R | R | S | ZG1  |

|         |            |          |          |          |          |          |          |          |      |
|---------|------------|----------|----------|----------|----------|----------|----------|----------|------|
| 2016-44 |            | R        | R        | R        | R        | R        | R        | S        | ZG1  |
| 2016-45 |            | R        | R        | R        | R        | R        | R        | S        | ZG1  |
| 2016-46 |            | <b>R</b> | <b>R</b> | <b>R</b> | <b>R</b> | <b>R</b> | <b>R</b> | <b>S</b> | ZG1  |
| 2016-47 |            | R        | R        | R        | R        | R        | R        | S        | ZG1  |
| 2016-48 |            | R        | R        | R        | R        | R        | R        | S        | ZG1  |
| 2016-49 |            | R        | R        | R        | R        | R        | R        | S        | ZG1  |
| 2016-50 |            | R        | R        | S        | R        | R        | R        | S        | ZC15 |
| 2016-51 |            | R        | R        | R        | R        | R        | R        | S        | ZG1  |
| 2016-52 |            | R        | S        | S        | S        | S        | S        | S        | ZB1  |
| 2016-53 |            | R        | R        | R        | R        | R        | R        | S        | ZG1  |
| 2016-54 |            | R        | S        | S        | R        | S        | S        | S        | ZB9  |
| 2016-55 |            | R        | R        | S        | R        | R        | R        | S        | ZC15 |
| 2016-56 |            | R        | S        | R        | R        | R        | R        | S        | ZB31 |
| 2016-57 |            | R        | R        | R        | R        | R        | R        | S        | ZG1  |
| 2016-58 |            | R        | R        | R        | S        | R        | S        | S        | ZD5  |
| 2016-59 | Lianyungan | R        | R        | R        | R        | R        | R        | S        | ZG1  |
| 2016-60 | g          | R        | R        | S        | S        | R        | R        | S        | ZC7  |
| 2016-61 |            | R        | R        | R        | R        | R        | R        | S        | ZG1  |
| 2016-62 |            | R        | R        | R        | R        | R        | R        | S        | ZG1  |
| 2016-63 |            | R        | S        | S        | R        | S        | R        | S        | ZB11 |
| 2016-64 |            | R        | R        | R        | R        | R        | R        | S        | ZG1  |
| 2016-65 |            | R        | R        | R        | R        | R        | R        | S        | ZG1  |
| 2016-66 |            | R        | R        | R        | R        | R        | R        | S        | ZG1  |
| 2016-67 |            | R        | R        | S        | R        | S        | R        | S        | ZC11 |
| 2016-68 |            | R        | S        | R        | R        | R        | R        | S        | ZB31 |
| 2016-69 |            | R        | R        | S        | R        | R        | R        | S        | ZC15 |
| 2016-70 |            | R        | S        | S        | S        | R        | S        | S        | ZB5  |
| 2016-71 |            | R        | R        | R        | R        | R        | R        | S        | ZG1  |
| 2016-72 |            | <b>R</b> | <b>R</b> | <b>S</b> | <b>R</b> | <b>S</b> | <b>R</b> | <b>S</b> | ZC11 |
| 2016-73 |            | R        | R        | S        | R        | R        | R        | S        | ZC15 |
| 2016-74 |            | R        | R        | R        | R        | R        | R        | S        | ZG1  |
| 2016-75 |            | R        | R        | R        | R        | R        | R        | S        | ZG1  |
| 2016-76 | Changzhou  | <b>R</b> | <b>S</b> | <b>S</b> | <b>S</b> | <b>R</b> | <b>S</b> | <b>S</b> | ZB5  |
| 2016-77 |            | S        | R        | R        | R        | S        | R        | S        | ZA59 |
| 2016-78 |            | R        | R        | R        | R        | R        | R        | S        | ZG1  |
| 2016-79 |            | R        | R        | R        | R        | R        | R        | S        | ZG1  |
| 2016-80 |            | R        | R        | R        | R        | R        | R        | S        | ZG1  |
| 2016-81 |            | R        | R        | S        | S        | R        | S        | S        | ZC5  |
| 2016-82 |            | R        | R        | R        | R        | R        | R        | S        | ZG1  |
| 2016-83 |            | R        | R        | R        | R        | S        | S        | S        | ZE1  |
| 2016-84 |            | R        | S        | R        | R        | S        | S        | S        | ZB25 |
| 2016-85 |            | R        | R        | R        | R        | R        | R        | S        | ZG1  |
| 2016-86 |            | S        | R        | R        | R        | R        | R        | S        | ZA63 |
| 2016-87 |            | S        | R        | S        | S        | S        | R        | S        | ZA35 |
| 2016-88 | Nantong    | R        | S        | S        | S        | S        | R        | S        | ZB3  |
| 2016-89 |            | R        | R        | R        | R        | R        | R        | S        | ZG1  |
| 2016-90 |            | R        | R        | S        | R        | R        | R        | S        | ZC15 |
| 2016-91 |            | R        | R        | R        | R        | R        | R        | S        | ZG1  |

|          |          |   |   |   |   |   |   |   |      |
|----------|----------|---|---|---|---|---|---|---|------|
| 2016-92  |          | R | R | R | S | R | R | S | ZG1  |
| 2016-93  |          | R | R | R | R | R | R | S | ZG1  |
| 2016-94  |          | S | S | S | R | R | S | S | ZA13 |
| 2016-95  |          | R | S | S | R | S | R | S | ZB11 |
| 2016-96  |          | R | S | S | S | S | S | S | ZB1  |
| 2016-97  |          | R | R | S | S | R | R | S | ZC7  |
| 2016-98  |          | R | R | R | R | S | S | S | ZE1  |
| 2016-99  |          | R | S | S | S | R | S | S | ZB5  |
| 2016-100 |          | R | R | R | R | R | R | S | ZG1  |
| 2016-101 |          | R | R | R | S | S | R | S | ZD3  |
| 2016-102 |          | R | R | S | R | R | R | S | ZC15 |
| 2016-103 |          | R | R | R | R | R | R | S | ZG1  |
| 2016-104 |          | R | R | R | R | R | R | S | ZG1  |
| 2016-105 |          | R | R | R | R | R | R | S | ZG1  |
| 2016-106 |          | R | R | S | R | R | R | S | ZC15 |
| 2016-107 |          | R | R | R | S | R | R | S | ZD7  |
| 2016-108 |          | S | R | S | S | S | S | S | ZA33 |
| 2016-109 |          | R | S | S | R | S | R | S | ZB11 |
| 2016-110 |          | R | S | S | R | S | R | S | ZB11 |
| 2016-111 | Yangzhou | R | S | S | S | S | S | S | ZB1  |
| 2016-112 |          | R | R | R | R | S | R | S | ZE3  |
| 2016-113 |          | R | R | R | R | S | S | S | ZE1  |
| 2016-114 |          | R | R | S | S | S | R | S | ZC3  |
| 2016-115 |          | R | R | R | R | S | S | S | ZE1  |
| 2016-116 |          | R | R | R | R | S | R | S | ZE3  |
| 2016-117 |          | R | R | S | R | S | S | S | ZC9  |
| 2016-118 |          | R | R | S | R | R | S | S | ZC13 |
| 2016-119 |          | R | R | R | S | S | R | S | ZD3  |
| 2016-120 |          | R | R | R | R | R | S | S | ZF1  |
| 2016-121 |          | R | R | S | S | S | S | S | ZC1  |
| 2016-122 |          | R | R | R | R | S | R | S | ZE3  |
| 2016-123 |          | S | R | S | R | S | R | S | ZA43 |
| 2016-124 |          | R | S | S | R | S | S | S | ZB9  |
| 2016-125 |          | R | R | S | S | S | S | S | ZC1  |
| 2016-126 |          | R | R | R | R | S | R | S | ZE3  |
| 2016-127 |          | R | S | S | R | R | R | S | ZB15 |
| 2016-128 |          | R | S | S | S | R | R | S | ZB7  |
| 2016-129 |          | R | S | S | R | R | R | S | ZB15 |
| 2016-130 |          | R | R | S | R | R | S | S | ZC13 |
| 2016-131 |          | R | R | R | R | R | R | S | ZG1  |
| 2016-132 |          | R | R | S | R | R | R | S | ZC15 |
| 2016-133 | Yancheng | R | R | R | R | R | R | S | ZG1  |
| 2016-134 |          | R | R | R | R | S | R | S | ZE3  |
| 2016-135 |          | R | R | R | R | S | R | S | ZE3  |
| 2016-136 |          | S | S | R | S | S | R | S | ZA19 |
| 2016-137 |          | R | R | S | R | R | R | S | ZC15 |
| 2016-138 |          | S | R | R | R | R | R | S | ZA63 |
| 2016-139 |          | S | S | R | R | S | S | S | ZA25 |

|          |         |   |   |   |   |   |   |   |      |
|----------|---------|---|---|---|---|---|---|---|------|
| 2016-140 |         | S | R | S | R | S | S | S | ZA41 |
| 2016-141 |         | S | S | S | R | R | S | S | ZA13 |
| 2016-142 |         | R | R | R | R | S | R | S | ZE3  |
| 2016-143 |         | S | R | R | R | S | R | S | ZA59 |
| 2016-144 |         | S | R | S | S | S | S | S | ZA33 |
| 2016-145 |         | R | R | R | R | R | R | S | ZG1  |
| 2016-146 |         | R | R | R | R | R | R | S | ZG1  |
| 2016-147 |         | R | R | R | R | S | R | S | ZE3  |
| 2016-148 |         | R | R | R | R | R | R | S | ZG1  |
| 2016-149 |         | R | R | R | R | R | R | S | ZG1  |
| 2016-150 |         | R | R | R | R | R | R | S | ZG1  |
| 2016-151 |         | S | R | S | S | S | S | S | ZA33 |
| 2016-152 |         | R | R | R | R | R | R | S | ZG1  |
| 2016-153 |         | R | R | R | R | R | R | S | ZG1  |
| 2016-154 |         | S | R | R | R | S | R | S | ZA59 |
| 2016-155 |         | S | R | R | S | S | R | S | ZA51 |
| <hr/>    |         |   |   |   |   |   |   |   |      |
| 2017-1   |         | R | R | R | R | R | R | S | ZG1  |
| 2017-2   |         | R | S | S | R | R | R | S | ZB15 |
| 2017-3   |         | R | R | R | R | R | R | S | ZG1  |
| 2017-4   |         | R | R | S | R | R | R | S | ZC15 |
| 2017-5   |         | R | R | R | R | R | R | S | ZG1  |
| 2017-6   |         | R | R | S | R | R | R | S | ZC15 |
| 2017-7   |         | R | S | R | R | R | R | S | ZB31 |
| 2017-8   |         | R | R | S | R | R | S | S | ZC13 |
| 2017-9   |         | R | R | R | R | R | R | S | ZG1  |
| 2017-10  | Xuzhou  | R | S | R | S | R | S | S | ZB21 |
| 2017-11  |         | R | R | S | R | R | R | S | ZC15 |
| 2017-12  |         | R | R | R | R | R | R | S | ZG1  |
| 2017-13  |         | R | R | S | R | R | R | S | ZC15 |
| 2017-14  |         | R | S | S | R | R | R | S | ZB15 |
| 2017-15  |         | R | R | R | S | R | R | S | ZD7  |
| 2017-16  |         | R | R | R | R | R | R | S | ZG1  |
| 2017-17  |         | R | R | R | R | R | S | S | ZF1  |
| 2017-18  |         | R | R | R | R | R | R | S | ZG1  |
| 2017-19  |         | R | R | S | R | R | R | S | ZG1  |
| 2017-20  |         | R | R | R | R | R | R | S | ZG1  |
| <hr/>    |         |   |   |   |   |   |   |   |      |
| 2017-21  |         | R | R | R | R | S | R | S | ZE3  |
| 2017-22  |         | S | S | R | S | S | S | S | ZA17 |
| 2017-23  |         | R | S | R | R | S | S | S | ZB25 |
| 2017-24  |         | R | R | R | R | R | R | S | ZG1  |
| 2017-25  |         | R | R | R | R | S | R | S | ZG1  |
| 2017-26  | Huai'an | S | R | S | R | R | S | S | ZA45 |
| 2017-27  |         | R | S | S | S | R | R | S | ZB7  |
| 2017-28  |         | R | R | R | R | R | R | S | ZG1  |
| 2017-29  |         | R | R | S | R | R | R | S | ZC15 |
| 2017-30  |         | R | R | S | R | R | R | S | ZC15 |
| 2017-31  |         | R | R | S | R | R | R | S | ZC15 |
| 2017-32  |         | R | R | S | R | R | R | S | ZC15 |

|         |            |   |   |   |   |   |   |   |      |
|---------|------------|---|---|---|---|---|---|---|------|
| 2017-33 |            | R | R | R | R | R | R | S | ZG1  |
| 2017-34 |            | R | R | R | R | R | R | S | ZG1  |
| 2017-35 |            | R | R | R | R | S | R | S | ZE3  |
| 2017-36 |            | R | R | R | R | S | R | S | ZE3  |
| 2017-37 |            | R | R | R | R | R | R | S | ZG1  |
| 2017-38 |            | R | R | R | R | R | R | S | ZG1  |
| 2017-39 |            | R | R | R | R | R | R | S | ZG1  |
| 2017-40 |            | R | R | R | R | R | R | S | ZG1  |
| 2017-41 |            | R | R | R | S | S | R | S | ZD3  |
| 2017-42 |            | S | R | R | R | S | R | S | ZA59 |
| 2017-43 |            | R | R | R | S | S | R | S | ZD3  |
| 2017-44 |            | R | R | R | S | R | R | S | ZD7  |
| 2017-45 |            | S | S | S | S | S | S | S | ZA1  |
| 2017-46 |            | S | R | S | R | S | R | S | ZA43 |
| 2017-47 | Lianyungan | R | S | S | R | R | R | S | ZB15 |
| 2017-48 | g          | R | R | S | R | R | R | S | ZC15 |
| 2017-49 |            | R | R | S | R | S | R | S | ZC11 |
| 2017-50 |            | R | R | S | S | S | S | S | ZC1  |
| 2017-51 |            | R | R | S | R | S | R | S | ZC11 |
| 2017-52 |            | R | R | R | R | R | R | S | ZG1  |
| 2017-53 |            | R | R | S | R | R | S | S | ZC13 |
| 2017-54 |            | R | R | R | R | R | R | S | ZG1  |
| 2017-55 |            | R | R | R | R | R | R | S | ZG1  |
| 2017-56 |            | R | R | S | S | R | S | S | ZC5  |
| 2017-57 |            | R | R | S | R | S | R | S | ZC11 |
| 2017-58 |            | R | R | R | R | R | R | S | ZG1  |
| 2017-59 |            | R | R | R | R | S | R | S | ZE3  |
| 2017-60 |            | R | S | S | S | R | S | S | ZB5  |
| 2017-61 |            | R | R | R | R | R | R | S | ZG1  |
| 2017-62 |            | R | R | S | R | R | R | S | ZC15 |
| 2017-63 |            | R | R | R | R | R | R | S | ZG1  |
| 2017-64 |            | R | R | S | R | R | R | S | ZC15 |
| 2017-65 | Yancheng   | R | R | R | R | R | R | S | ZG1  |
| 2017-66 |            | R | R | R | R | R | R | S | ZG1  |
| 2017-67 |            | R | R | S | S | S | S | S | ZC1  |
| 2017-68 |            | R | R | S | S | R | S | S | ZC5  |
| 2017-69 |            | R | R | S | R | R | R | S | ZC15 |
| 2017-70 |            | R | R | R | R | R | S | S | ZF1  |
| 2017-71 |            | R | R | R | R | S | S | S | ZE1  |
| 2017-72 |            | R | R | R | R | R | R | S | ZG1  |
| 2017-73 |            | R | R | R | R | R | S | S | ZF1  |
| 2017-74 |            | R | R | R | R | R | R | S | ZG1  |
| 2017-75 |            | R | R | S | R | S | R | S | ZC11 |
| 2017-76 |            | R | R | R | R | R | R | S | ZG1  |
| 2017-77 |            | R | R | R | R | R | R | S | ZG1  |
| 2017-78 | Nanjing    | R | R | R | R | R | R | S | ZG1  |
| 2017-79 |            | R | R | S | R | R | S | S | ZC13 |
| 2017-80 |            | R | R | R | R | R | R | S | ZG1  |



|          |          |   |   |   |   |   |   |   |      |
|----------|----------|---|---|---|---|---|---|---|------|
| 2017-81  |          | R | R | R | R | R | R | S | ZG1  |
| 2017-82  |          | R | R | S | R | R | R | S | ZC15 |
| 2017-83  |          | R | R | S | R | R | S | S | ZC13 |
| 2017-84  |          | R | R | S | R | R | R | S | ZC15 |
| 2017-85  |          | R | R | R | R | R | R | S | ZG1  |
| 2017-86  |          | R | R | R | R | R | R | S | ZG1  |
| 2017-87  |          | R | R | R | R | R | R | S | ZG1  |
| 2017-88  |          | R | S | S | R | R | R | S | ZB15 |
| 2017-89  |          | R | R | R | R | R | R | S | ZG1  |
| 2017-90  |          | R | R | S | R | R | R | S | ZC15 |
| 2017-91  |          | R | S | S | S | R | S | S | ZB5  |
| 2017-92  |          | R | R | S | R | R | R | S | ZC15 |
| 2017-93  |          | R | S | S | R | R | S | S | ZB13 |
| 2017-94  |          | R | R | R | R | S | R | S | ZE3  |
| 2017-95  |          | R | S | S | S | R | R | S | ZB7  |
| 2017-96  |          | R | R | R | R | R | R | S | ZG1  |
| 2017-97  |          | R | S | S | R | R | R | S | ZB15 |
| 2017-98  |          | R | R | S | R | R | S | S | ZC13 |
| <hr/>    |          |   |   |   |   |   |   |   |      |
| 2017-99  |          | S | S | S | S | R | S | S | ZA5  |
| 2017-100 |          | R | S | S | R | R | R | S | ZB15 |
| 2017-101 |          | R | R | R | R | R | R | S | ZG1  |
| 2017-102 |          | R | R | S | R | R | R | S | ZC15 |
| 2017-103 |          | R | R | R | R | R | R | S | ZG1  |
| 2017-104 |          | R | R | R | R | R | S | S | ZF1  |
| 2017-105 |          | R | S | S | S | R | R | S | ZB7  |
| 2017-106 |          | R | R | S | R | R | S | S | ZC13 |
| 2017-107 |          | R | S | S | R | R | R | S | ZB15 |
| 2017-108 |          | R | S | S | S | R | S | S | ZB5  |
| 2017-109 | Yangzhou | R | R | R | R | S | R | S | ZE3  |
| 2017-110 |          | R | R | R | R | R | R | S | ZG1  |
| 2017-111 |          | R | R | S | R | R | R | S | ZC15 |
| 2017-112 |          | R | R | R | R | R | R | S | ZG1  |
| 2017-113 |          | R | R | R | R | R | R | S | ZG1  |
| 2017-114 |          | R | R | R | R | S | R | S | ZE3  |
| 2017-115 |          | R | R | S | S | R | S | S | ZC5  |
| 2017-116 |          | R | R | S | R | S | R | S | ZC11 |
| 2017-117 |          | R | R | R | R | R | R | S | ZG1  |
| 2017-118 |          | R | S | S | S | R | S | S | ZB5  |
| 2017-119 |          | R | R | R | R | R | R | S | ZG1  |
| <hr/>    |          |   |   |   |   |   |   |   |      |
| 2017-120 |          | R | R | R | R | R | R | S | ZG1  |
| 2017-121 |          | R | R | R | R | S | R | S | ZE3  |
| 2017-122 |          | R | R | R | R | R | R | S | ZG1  |
| 2017-123 |          | R | R | R | R | R | R | S | ZG1  |
| 2017-124 | Nantong  | R | S | R | R | R | R | S | ZB31 |
| 2017-125 |          | R | S | S | S | S | S | S | ZB1  |
| 2017-126 |          | R | R | S | S | R | R | S | ZC7  |
| 2017-127 |          | R | R | S | S | R | R | S | ZC7  |
| 2017-128 |          | R | R | S | R | R | R | S | ZC15 |

|          |           |   |   |   |   |   |   |      |
|----------|-----------|---|---|---|---|---|---|------|
| 2017-129 |           | R | R | R | R | R | S | ZG1  |
| 2017-130 |           | R | R | R | R | R | S | ZG1  |
| 2017-131 |           | R | R | R | R | R | S | ZG1  |
| 2017-132 |           | R | R | R | R | R | S | ZG1  |
| 2017-133 |           | R | R | R | R | R | S | ZG1  |
| 2017-134 |           | R | R | R | R | R | S | ZG1  |
| 2017-135 | Suzhou    | R | R | R | R | R | S | ZG1  |
| 2017-136 |           | R | R | R | R | R | S | ZG1  |
| 2017-137 |           | R | S | S | R | R | S | ZB15 |
| 2017-138 |           | R | S | S | R | R | S | ZB15 |
| 2017-139 |           | R | R | S | S | R | S | ZC7  |
| 2017-140 |           | R | R | S | S | R | S | ZC7  |
| 2017-141 |           | R | S | S | R | R | S | ZB13 |
| 2017-142 |           | R | S | R | R | R | S | ZB31 |
| 2017-143 | Changzhou | R | R | R | R | R | S | ZG1  |
| 2017-144 |           | R | R | S | R | R | S | ZC15 |
| 2017-145 |           | R | S | S | R | R | S | ZB15 |
| 2017-146 |           | R | R | R | R | R | S | ZG1  |
| 2017-147 |           | R | R | R | R | R | S | ZG1  |
| 2017-148 |           | R | S | S | R | R | S | ZB15 |
| 2017-149 |           | R | R | R | R | R | S | ZG1  |

Note: R: Resistant; S: Susceptible

**Table S2.** Parameters used for characterization of race and resistance structures in this study.

| Parameter                                                      | Definition of sub-parameters                                                                                                              | Equation                               |
|----------------------------------------------------------------|-------------------------------------------------------------------------------------------------------------------------------------------|----------------------------------------|
| <b>Race diversity</b>                                          |                                                                                                                                           |                                        |
| Race diversity index ( $h_{rdi}$ )                             | $N$ represented the number of isolates within a population; $x_i$ represented the frequency of race # $i$                                 | $h_{rdi} = [(N/N-1)(1-\sum x_i^2)]$    |
| Total race frequency ( $f_{tr}$ )                              | $tr$ represented the number of race identified within a given population                                                                  | $f_{tr} = [(tr/N) \times 100\%]$       |
| <b>Common race structure</b>                                   |                                                                                                                                           |                                        |
| Population common race frequency ( $f_{pcr}$ )                 | $pcr$ represented the number of population-common races across all populations                                                            | $f_{pcr} = [(pcr/tr) \times 100\%]$    |
| Population common race isolate frequency ( $f_{pcri}$ )        | $pcri$ represented the number of population-common race isolates within a population                                                      | $f_{pcri} = [(pcri/N) \times 100\%]$   |
| Total population common race isolate frequency ( $f_{tpcri}$ ) | $tpcri$ represented the total number of population-common race isolates within a population                                               | $f_{tpcri} = [(tpcri/N) \times 100\%]$ |
| <b>Dominant race structure</b>                                 |                                                                                                                                           |                                        |
| Top one race isolate frequency ( $f_{tri}$ )                   | $tri$ represented the number of top one race isolates within a population                                                                 | $f_{tri} = [(tri/N) \times 100\%]$     |
| <b>Resistance gene structure</b>                               |                                                                                                                                           |                                        |
| Cultivar resistance frequency ( $f_{CR}$ )                     | $CRI$ represented the number of isolates that were avirulent on a CDC entry                                                               | $f_{CR} = [(CRI/N) \times 100\%]$      |
| Total cultivar resistance frequency                            | $TCRI$ represented the total number of isolates that were avirulent across all populations; $TN$ represented the total number of isolates | $f_{TCR} = [(TCRI/TN) \times 100\%]$   |

---

 $(f_{TCR})$ 

---

---

of all populations

---

**Table S3.** Race diversity of 14 populations of *P. oryzae* in northern and mid-southern Jiangsu from 2003 to 2017 was tested with CDC entries.

| Parameter                           | Northern Jiangsu          |                    |                    |                    |                    |                    |                   |                    |                    |                    |                    |                    |                    |                    |
|-------------------------------------|---------------------------|--------------------|--------------------|--------------------|--------------------|--------------------|-------------------|--------------------|--------------------|--------------------|--------------------|--------------------|--------------------|--------------------|
|                                     | 2003<br>(45) <sup>A</sup> | 2004<br>(66)       | 2005<br>(49)       | 2006<br>(7)        | 2007<br>(57)       | 2009<br>(45)       | 2010<br>(24)      | 2011<br>(64)       | 2012<br>(47)       | 2013<br>(90)       | 2014<br>(102)      | 2015<br>(111)      | 2016<br>(127)      | 2017<br>(109)      |
| No. of race group                   | 6                         | 6                  | 4                  | 2                  | 6                  | 6                  | 5                 | 6                  | 4                  | 6                  | 6                  | 7                  | 7                  | 7                  |
| No. of race                         | 13                        | 17                 | 8                  | 4                  | 15                 | 16                 | 9                 | 13                 | 10                 | 13                 | 15                 | 23                 | 36                 | 25                 |
| Race frequency ( $f_{tr}$ )         | 28.89 <sup>a</sup>        | 25.76 <sup>a</sup> | 16.33 <sup>a</sup> | 57.14 <sup>b</sup> | 26.32 <sup>a</sup> | 35.56 <sup>a</sup> | 37.5 <sup>a</sup> | 20.31 <sup>a</sup> | 21.28 <sup>a</sup> | 14.44 <sup>a</sup> | 14.71 <sup>a</sup> | 20.72 <sup>a</sup> | 28.35 <sup>a</sup> | 22.94 <sup>a</sup> |
| Race diversity index ( $h_{r di}$ ) | 0.748                     | 0.676              | 0.605              | 0.810              | 0.818              | 0.846              | 0.768             | 0.874              | 0.677              | 0.821              | 0.681              | 0.783              | 0.865              | 0.825              |
| $\chi^2$ for $f_{tr}$               | 24.60 <sup>B</sup>        |                    |                    |                    |                    |                    |                   |                    |                    |                    |                    |                    |                    |                    |
| Parameter                           | Mid-southern Jiangsu      |                    |                    |                    |                    |                    |                   |                    |                    |                    |                    |                    |                    |                    |
|                                     | 2003<br>(61) <sup>A</sup> | 2004<br>(35)       | 2005<br>(33)       | 2006<br>(34)       | 2007<br>(12)       | 2009<br>(25)       | 2010<br>(32)      | 2011<br>(10)       | 2012<br>(47)       | 2013<br>(85)       | 2014<br>(96)       | 2015<br>(103)      | 2016<br>(28)       | 2017<br>(40)       |
| No. of race group                   | 7                         | 4                  | 5                  | 3                  | 5                  | 7                  | 6                 | 4                  | 4                  | 4                  | 6                  | 7                  | 7                  | 4                  |
| No. of race                         | 13                        | 7                  | 7                  | 4                  | 5                  | 13                 | 13                | 6                  | 8                  | 12                 | 12                 | 16                 | 14                 | 10                 |

|                                                             |                           |                           |                           |                    |                           |                    |                           |                    |                    |                    |                    |                    |                    |                           |
|-------------------------------------------------------------|---------------------------|---------------------------|---------------------------|--------------------|---------------------------|--------------------|---------------------------|--------------------|--------------------|--------------------|--------------------|--------------------|--------------------|---------------------------|
| <b>Race<br/>frequency<br/>(<math>f_{tr}</math>)</b>         | 21.31 <sup>a,<br/>b</sup> | 20.00 <sup>a,<br/>b</sup> | 21.21 <sup>a,<br/>b</sup> | 11.76 <sup>a</sup> | 41.67 <sup>b,<br/>c</sup> | 52.00 <sup>c</sup> | 40.63 <sup>b,<br/>c</sup> | 60.00 <sup>c</sup> | 17.02 <sup>a</sup> | 14.12 <sup>a</sup> | 12.50 <sup>a</sup> | 15.53 <sup>a</sup> | 50.00 <sup>c</sup> | 25.00 <sup>a,<br/>b</sup> |
| <b>Race<br/>diversity<br/>index (<math>h_{r di}</math>)</b> | 0.525                     | 0.555                     | 0.619                     | 0.273              | 0.758                     | 0.863              | 0.863                     | 0.778              | 0.710              | 0.857              | 0.707              | 0.747              | 0.897              | 0.768                     |
| <b><math>\chi^2</math> for <math>f_{tr}</math></b>          | 57.49 <sup>C</sup>        |                           |                           |                    |                           |                    |                           |                    |                    |                    |                    |                    |                    |                           |

A: Numbers shown in parentheses indicates the numbers of isolates tested. B: Significant at the P = 0.05 level for a  $\chi^2$ . The same superscript lowercase letters represent no significant difference at the P = 0.05 level. C: Significant at the P = 0.01 level for a  $\chi^2$ . The same superscript lowercase letters represent no significant difference at the P = 0.05 level.

**Table S4.** Common races of *P. oryzae* in 14 populations of isolates in northern and mid-southern Jiangsu from 2003 to 2017.

| Northern Jiangsu      |            |       |       |       |           |                          |                          |                          |
|-----------------------|------------|-------|-------|-------|-----------|--------------------------|--------------------------|--------------------------|
| Race/Parameter        |            | ZB15  | ZC15  | ZG1   | $f_{pcr}$ | $\Sigma/f_{tpcri}$       | $\chi^2$ for $f_{tpcri}$ |                          |
| 2003(45) <sup>A</sup> | No.        | 1     | 1     | 22    | 23.08     | 53.33 <sup>c, d</sup>    | 75.69 <sup>B</sup>       |                          |
|                       | $f_{pcri}$ | 2.22  | 2.22  | 48.89 |           |                          |                          |                          |
| 2004(66)              | No.        | 2     | 1     | 37    | 17.65     | 60.61 <sup>b-d</sup>     |                          |                          |
|                       | $f_{pcri}$ | 3.03  | 1.52  | 56.06 |           |                          |                          |                          |
| 2005(49)              | No.        | 2     | 6     | 30    | 37.50     | 77.55 <sup>b, e</sup>    |                          |                          |
|                       | $f_{pcri}$ | 4.08  | 12.24 | 61.22 |           |                          |                          |                          |
| 2006(7)               | No.        | 1     | 0     | 2     | 50.00     | 42.86 <sup>a-d</sup>     |                          |                          |
|                       | $f_{pcri}$ | 14.29 | 0.00  | 28.57 |           |                          |                          |                          |
| 2007(57)              | No.        | 3     | 5     | 18    | 21.43     | 45.61 <sup>a, d</sup>    |                          |                          |
|                       | $f_{pcri}$ | 5.26  | 8.77  | 31.58 |           |                          |                          |                          |
| 2009(45)              | No.        | 9     | 3     | 15    | 18.75     | 60.00 <sup>b-d</sup>     |                          |                          |
|                       | $f_{pcri}$ | 20.00 | 6.67  | 33.33 |           |                          |                          |                          |
| 2010(24)              | No.        | 3     | 4     | 11    | 33.33     | 75.00 <sup>b, c, e</sup> |                          |                          |
|                       | $f_{pcri}$ | 12.50 | 16.67 | 45.83 |           |                          |                          |                          |
| 2011(64)              | No.        | 1     | 9     | 11    | 23.08     | 32.81 <sup>a</sup>       |                          |                          |
|                       | $f_{pcri}$ | 1.56  | 14.06 | 17.19 |           |                          |                          |                          |
| 2012(47)              | No.        | 7     | 8     | 25    | 30.00     | 85.11 <sup>e</sup>       |                          |                          |
|                       | $f_{pcri}$ | 14.89 | 17.02 | 53.19 |           |                          |                          |                          |
| 2013(90)              | No.        | 14    | 16    | 30    | 23.08     | 66.67 <sup>b, c</sup>    |                          |                          |
|                       | $f_{pcri}$ | 15.56 | 17.78 | 33.33 |           |                          |                          |                          |
| 2014(102)             | No.        | 2     | 29    | 50    | 20.00     | 79.41 <sup>e</sup>       |                          |                          |
|                       | $f_{pcri}$ | 1.96  | 28.43 | 49.02 |           |                          |                          |                          |
| 2015(111)             | No.        | 2     | 11    | 48    | 13.04     | 54.95 <sup>c, d</sup>    |                          |                          |
|                       | $f_{pcri}$ | 1.80  | 9.91  | 43.24 |           |                          |                          |                          |
| 2016(127)             | No.        | 2     | 14    | 43    | 8.33      | 46.46 <sup>a, d</sup>    |                          |                          |
|                       | $f_{pcri}$ | 1.57  | 11.02 | 33.86 |           |                          |                          |                          |
| 2017(109)             | No.        | 5     | 15    | 42    | 12.00     | 56.88 <sup>c, d</sup>    |                          |                          |
|                       | $f_{pcri}$ | 4.59  | 13.76 | 38.53 |           |                          |                          |                          |
| Mid-southern Jiangsu  |            |       |       |       |           |                          |                          |                          |
| Race/Parameter        |            | ZB15  | ZC15  | ZG1   | $f_{pcr}$ | $\Sigma/f_{tpcri}$       |                          | $\chi^2$ for $f_{tpcri}$ |
| 2003(61) <sup>A</sup> | No.        | 2     | 1     | 42    | 23.08     | 73.77 <sup>a-c</sup>     |                          | 58.78 <sup>B</sup>       |
|                       | $f_{pcri}$ | 3.28  | 1.64  | 68.85 |           |                          |                          |                          |
| 2004(35)              | No.        | 1     | 0     | 23    | 28.57     | 68.57 <sup>a-c</sup>     |                          |                          |
|                       | $f_{pcri}$ | 2.86  | 0     | 65.71 |           |                          |                          |                          |
| 2005(33)              | No.        | 1     | 2     | 20    | 37.5      | 69.70 <sup>a-c</sup>     |                          |                          |

75.69<sup>B</sup>

58.78<sup>B</sup>

|           |           |       |       |       |       |                       |
|-----------|-----------|-------|-------|-------|-------|-----------------------|
|           | $f_{pri}$ | 3.03  | 6.06  | 60.61 |       |                       |
| 2006(34)  | No.       | 0     | 1     | 29    | 50    | 88.24 <sup>c</sup>    |
|           | $f_{pri}$ | 0     | 2.94  | 85.29 |       |                       |
| 2007(12)  | No.       | 0     | 0     | 4     | 20    | 33.33 <sup>a</sup>    |
|           | $f_{pri}$ | 0     | 0     | 33.33 |       |                       |
| 2009(25)  | No.       | 0     | 3     | 9     | 15.38 | 48.00 <sup>a, b</sup> |
|           | $f_{pri}$ | 0     | 12    | 36    |       |                       |
| 2010(32)  | No.       | 0     | 1     | 11    | 15.38 | 37.50 <sup>a</sup>    |
|           | $f_{pri}$ | 0     | 3.13  | 34.38 |       |                       |
| 2011(10)  | No.       | 0     | 1     | 5     | 33.33 | 60.00 <sup>a-c</sup>  |
|           | $f_{pri}$ | 0     | 10    | 50    |       |                       |
| 2012(47)  | No.       | 9     | 22    | 10    | 37.5  | 87.23 <sup>c</sup>    |
|           | $f_{pri}$ | 19.15 | 46.81 | 21.28 |       |                       |
| 2013(85)  | No.       | 17    | 17    | 17    | 25    | 60.00 <sup>a-c</sup>  |
|           | $f_{pri}$ | 20    | 20    | 20    |       |                       |
| 2014(96)  | No.       | 6     | 39    | 34    | 25    | 82.29 <sup>c</sup>    |
|           | $f_{pri}$ | 6.25  | 40.63 | 35.42 |       |                       |
| 2015(103) | No.       | 2     | 20    | 47    | 18.75 | 66.99 <sup>a-c</sup>  |
|           | $f_{pri}$ | 1.94  | 19.42 | 45.63 |       |                       |
| 2016(28)  | No.       | 0     | 6     | 7     | 14.29 | 46.43 <sup>a</sup>    |
|           | $f_{pri}$ | 0     | 21.43 | 25    |       |                       |
| 2017(40)  | No.       | 6     | 5     | 18    | 30    | 72.50 <sup>a-c</sup>  |
|           | $f_{pri}$ | 15    | 12.5  | 45    |       |                       |

---

A: Numbers shown in parentheses indicates the numbers of isolates tested. B: Significant at the  $P = 0.01$  level for a  $\chi^2$ . The same superscript lowercase letters represent no significant difference at the  $P = 0.05$  level.

**Table S5.** Resistance genes and resistance frequency of a set of CDC entries that were challenged with isolates collected in northern and mid-southern Jiangsu from 2003 to 2017.

| Differential cultivar                      |            | Tetep          | Zhenlong 13                    | Sifeng 43          | Dongnong 363      | Kando 51      | Hejiang 18         | Lijiangxintuanheigu |
|--------------------------------------------|------------|----------------|--------------------------------|--------------------|-------------------|---------------|--------------------|---------------------|
| Race code                                  |            | A64            | B32                            | C16                | D8                | E4            | F2                 | G1                  |
| Resistance gene                            |            | Pi1, Pi4, Pi54 | Pik, Pia, $\beta$ , $\epsilon$ | Pib, Pia, $\alpha$ | Pik, Pia, $\beta$ | Pik, $\gamma$ | Pii, Pia, $\delta$ | Pik-I               |
| Resistance gene ( $f_{CR}$ )               | 2003 (45)  | 100.00*        | 73.33                          | 68.89              | 77.78             | 95.56*        | 60.00              | 0.00                |
|                                            | 2004 (66)  | 100.00*        | 75.76                          | 78.79              | 90.91*            | 87.88*        | 69.70              | 0.00                |
|                                            | 2005 (49)  | 100.00*        | 85.71*                         | 71.43              | 97.96*            | 100.00*       | 83.67              | 0.00                |
|                                            | 2006 (7)   | 100.00*        | 28.57                          | 28.57              | 85.71*            | 100.00*       | 42.86              | 0.00                |
|                                            | 2007 (57)  | 92.98*         | 78.95                          | 70.18              | 84.21             | 100.00*       | 47.37              | 0.00                |
|                                            | 2009 (45)  | 97.78*         | 60.00                          | 57.78              | 82.22             | 88.89*        | 86.67*             | 0.00                |
|                                            | 2010 (24)  | 95.83*         | 75.00                          | 62.50              | 87.50*            | 79.17         | 87.50*             | 0.00                |
|                                            | 2011 (64)  | 96.88*         | 92.19*                         | 67.19              | 46.88             | 37.50         | 54.69              | 0.00                |
|                                            | 2012 (47)  | 100.00*        | 76.60                          | 57.45              | 95.74*            | 93.62*        | 91.49*             | 0.00                |
|                                            | 2013 (90)  | 98.89*         | 60.00                          | 40.00              | 81.11             | 97.78*        | 84.44              | 0.00                |
|                                            | 2014 (102) | 97.06*         | 89.22*                         | 53.92              | 89.22*            | 97.06*        | 92.16*             | 0.00                |
|                                            | 2015 (111) | 93.69*         | 86.49*                         | 75.68              | 81.08             | 73.87         | 89.19*             | 0.00                |
|                                            | 2016 (127) | 83.46          | 81.10                          | 59.06              | 75.59             | 62.20         | 77.17              | 0.00                |
|                                            | 2017 (109) | 94.50*         | 83.49                          | 57.80              | 80.73             | 77.98         | 78.90              | 0.00                |
| Total resistance frequencies ( $f_{TCR}$ ) |            | 95.12          | 79.22                          | 61.93              | 81.44             | 82.08         | 77.94              | 0.00                |
| Mid-southern Jiangsu                       |            |                |                                |                    |                   |               |                    |                     |
| Differential cultivar                      |            | Tetep          | Zhenlong 13                    | Sifeng 43          | Dongnong 363      | Kando 51      | Hejiang 18         | Lijiangxintuanheigu |
| Race code                                  |            | A64            | B32                            | C16                | D8                | E4            | F2                 | G1                  |



|                                     | Resistance gene                                            | Pi1, Pi4,<br>Pi54 | Pik, Pia, $\beta$ , $\epsilon$ | Pib, Pia, $\alpha$ | Pik, Pia, $\beta$ | Pik, $\gamma$ | Pii, Pia, $\delta$ | Pik-I |
|-------------------------------------|------------------------------------------------------------|-------------------|--------------------------------|--------------------|-------------------|---------------|--------------------|-------|
| Resistan<br>ce gene<br>( $f_{CR}$ ) | 2003 (61)                                                  | 98.36*            | 80.33                          | 83.61              | 91.80*            | 95.08*        | 81.97              | 0.00  |
|                                     | 2004 (35)                                                  | 100.00*           | 88.57*                         | 94.29*             | 100.00*           | 80.00         | 88.57*             | 0.00  |
|                                     | 2005 (33)                                                  | 100.00*           | 84.85                          | 93.94*             | 90.91*            | 81.82         | 93.94*             | 0.00  |
|                                     | 2006 (34)                                                  | 100.00*           | 100.00*                        | 91.18*             | 100.00*           | 94.12*        | 94.12*             | 0.00  |
|                                     | 2007 (12)                                                  | 100.00*           | 91.67*                         | 91.67*             | 91.67*            | 100.00*       | 41.67              | 0.00  |
|                                     | 2009 (25)                                                  | 96.00*            | 72.00                          | 76.00              | 76.00             | 80.00         | 84.00              | 0.00  |
|                                     | 2010 (32)                                                  | 100.00*           | 78.13                          | 81.25              | 68.75             | 46.88         | 62.50              | 0.00  |
|                                     | 2011 (10)                                                  | 100.00*           | 100.00*                        | 90.00*             | 80.00             | 70.00         | 80.00              | 0.00  |
|                                     | 2012 (47)                                                  | 100.00*           | 76.60                          | 23.40              | 91.49*            | 95.74*        | 89.36*             | 0.00  |
|                                     | 2013 (85)                                                  | 100.00*           | 45.88                          | 24.71              | 75.29             | 97.65*        | 80.00              | 0.00  |
|                                     | 2014 (96)                                                  | 98.96*            | 90.63*                         | 40.63              | 94.79*            | 97.92*        | 89.58*             | 0.00  |
|                                     | 2015 (103)                                                 | 98.06*            | 81.55                          | 64.08              | 87.38*            | 92.23*        | 92.23*             | 0.00  |
|                                     | 2016 (28)                                                  | 96.43*            | 82.14                          | 53.57              | 78.57             | 78.57         | 75.00              | 0.00  |
|                                     | 2017 (40)                                                  | 100.00*           | 72.50                          | 50.00              | 90.00*            | 97.50*        | 85.00*             | 0.00  |
|                                     | <b>Total resistance frequencies (<math>f_{TCR}</math>)</b> | 99.06             | 78.63                          | 59.75              | 87.52             | 90.02         | 84.87              | 0.00  |

Note: The asterisk indicates higher levels of resistance (> 85%).
